# Supplementary material for: Phenotypic Characterization and Draft Genome Sequence Analyses of Two Novel Endospore-Forming Sporosarcina spp. Isolated from Canada Goose (Branta canadensis) Feces
Source: MDPI journal article supplement (doi:10.3390/microorganisms12010070), 2023-12-29
Supplement: s1 [file s1]

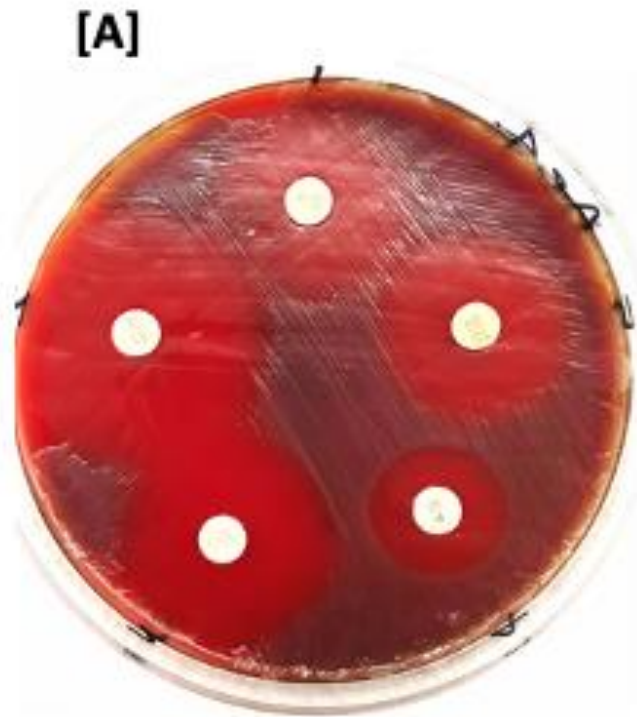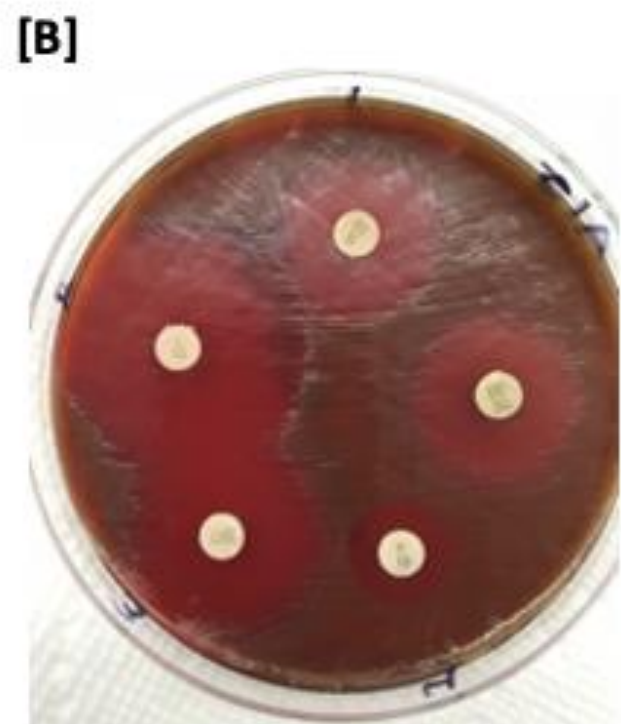

**Fig.S1 Representative antibiotic disc diffusion assay for *Sporosarcina cascadiensis* A4 (cascadiensis. L. masc. adj. cascadiensis) [A], and *Sporosarcina obsidiansis* A15 (obsidiansis L. masc. adj. obsidiansis) [B]. The antibiotic discs are as listed from the top in order clockwise as streptomycin, erythromycin, penicillin, chloramphenicol, and tetracycline. Both isolates were sensitive to the assayed antibiotics.**

**Methods: The A4 and A15 isolates were assayed by disc diffusion to streptomycin, erythromycin, penicillin, chloramphenicol, and tetracycline to determine antibiotic resistances as described in [29].**
