# Supplementary material for: Phenotypic Characterization and Draft Genome Sequence Analyses of Two Novel Endospore-Forming Sporosarcina spp. Isolated from Canada Goose (Branta canadensis) Feces
Source: MDPI journal article supplement (doi:10.3390/microorganisms12010070), 2023-12-29
Supplement: s1 [file s1]

**Table S1.** Metabolic profiling of strains A4 and A15 on Biolog PM9 and PM10 MicroPlate.

| PM9 Osmolytes                              | Strain A4 | Strain A15 |
|--------------------------------------------|-----------|------------|
| NaCl 1%                                    | ++        | ++         |
| NaCl 2%                                    | ++        | ++         |
| NaCl 3%                                    | ++        | ++         |
| NaCl 4%                                    | +         | +          |
| NaCl 5%                                    | +         | —          |
| NaCl 9%                                    | +         | —          |
| NaCl 10%                                   | +         | —          |
| NaCl 6% + Creatine                         | +         | —          |
| NaCl 6% + Creatinine                       | +         | —          |
| NaCl 6% + KCl                              | ++        | +          |
| NaCl 6% + L-Proline                        | +         | —          |
| NaCl 6% + $\beta$ -Glutamic Acid           | +         | —          |
| NaCl 6% + $\gamma$ -Amino -N- Butyric Acid | +         | —          |
| NaCl 6% + Glutathione                      | +         | +          |
| NaCl 6% + Glycerol                         | +         | —          |
| NaCl 6% + Trehalose                        | ++        | —          |
| NaCl 6% + Trimethylamine- N-oxide          | +         | —          |
| NaCl 6% + Trimethylamine                   | +         | —          |
| NaCl 6% + Trigonelline                     | +         | —          |
| Potassium chloride 3%                      | +         | ++         |
| Potassium chloride 4%                      | +         | ++         |
| Potassium chloride 5%                      | —         | ++         |
| Potassium chloride 6%                      | —         | ++         |
| Sodium sulfate 2%                          | +         | ++         |
| Sodium sulfate 3%                          | ++        | ++         |
| Sodium sulfate 4%                          | +         | ++         |
| Sodium sulfate 5%                          | ++        | ++         |
| Ethylene glycol 5%                         | —         | ++         |
| Ethylene glycol 10%                        | —         | ++         |
| Sodium formate 1%                          | —         | ++         |
| Urea 2%                                    | —         | ++         |
| Sodium Lactate 1%                          | —         | ++         |
| Sodium Phosphate pH 7 20mM                 | —         | ++         |
| Sodium Phosphate pH 7 -50mM                | —         | ++         |
| Sodium Phosphate pH 7 -100mM               | —         | +          |
| Sodium Phosphate pH 7 -200mM               | +         | —          |
| Ammonium sulfate pH8 -10mM                 | +         | ++         |
| Ammonium sulfate pH8 -20mM                 | +         | ++         |

|                             |   |    |
|-----------------------------|---|----|
| Ammonium sulfate pH8 -50mM  | — | ++ |
| Ammonium sulfate pH8 -100mM | — | ++ |
| Sodium Nitrate 10mM         | — | ++ |
| Sodium Nitrate 20mM         | + | ++ |
| Sodium Nitrate 40mM         | + | ++ |
| Sodium Nitrate 60mM         | + | ++ |
| Sodium Nitrate 80mM         | + | ++ |
| Sodium Nitrate 100mM        | + | ++ |
| Sodium Nitrite 10mM         | — | ++ |
| Sodium Nitrite 20mM         | — | ++ |
| Sodium Nitrite 40mM         | — | ++ |
| Sodium Nitrite 60mM         | — | +  |

---

**PM10 pH**


---

|                          |    |    |
|--------------------------|----|----|
| pH 6                     | =  | ++ |
| pH 7                     | =  | ++ |
| pH 8                     | +  | ++ |
| pH 8.5                   | +  | ++ |
| pH 9                     | +  | ++ |
| pH 9.5                   | ++ | ++ |
| pH 10                    | ++ | +  |
| pH 9.5                   | +  | +  |
| pH 9.5 + L-Alanine       | ++ | +  |
| pH 9.5 + L-Arginine      | ++ | ++ |
| pH 9.5 + L-Asparagine    | ++ | ++ |
| pH 9.5 + L-Aspartic Acid | ++ | ++ |
| pH 9.5 + L-Glutamic Acid | ++ | ++ |
| pH 9.5 + L-Glutamine     | ++ | ++ |
| pH 9.5 + Glycine         | ++ | ++ |
| pH 9.5 + L-Histidine     | ++ | ++ |
| pH 9.5 + L-Isoleucine    | ++ | ++ |
| pH 9.5 + L-Leucine       | ++ | ++ |
| pH 9.5 + L-Lysine        | ++ | +  |
| pH 9.5 + L-Methionine    | ++ | ++ |
| pH 9.5 + L-Phenylalanine | ++ | ++ |
| pH 9.5 + L-Proline       | ++ | ++ |
| pH 9.5 + L-Serine        | ++ | ++ |
| pH 9.5 + L-Threonine     | ++ | ++ |
| pH 9.5 + L-Tryptophan    | ++ | ++ |
| pH 9.5 + L-Tyrosine      | ++ | ++ |

|                                  |    |    |
|----------------------------------|----|----|
| pH 9.5 + L-Valine                | ++ | ++ |
| pH 9.5 + Hydroxy- L-Proline      | ++ | ++ |
| pH 9.5 + L-Ornithine             | ++ | ++ |
| pH 9.5 + L-Homoarginine          | ++ | ++ |
| pH 9.5 + L-Homoserine            | ++ | ++ |
| pH 9.5 + Anthranilic acid        | +  | ++ |
| pH 9.5 + L-Norleucine            | ++ | ++ |
| pH 9.5 + L-Norvaline             | ++ | ++ |
| pH 9.5 + Agmatine                | +  | +  |
| pH 9.5 + Cadaverine              | ++ | ++ |
| pH 9.5 + Putrescine              | ++ | ++ |
| pH 9.5 + Histamine               | ++ | ++ |
| pH 9.5 + Phenylethylamine        | +  | +  |
| pH 9.5 + Tyramine                | +  | +  |
| pH 9.5 + Creatine                | +  | +  |
| pH 9.5 + Trimethylamine- N-oxide | +  | +  |
| pH 9.5 + Urea                    | ++ | ++ |
| X- $\alpha$ -D-Glucoside         | +  | ++ |
| X- $\beta$ -D-Glucoside          | +  | ++ |
| X- $\alpha$ -D-Galactoside       | +  | ++ |
| X- $\beta$ -D-Galactoside        | =  | ++ |
| X- $\alpha$ - D-Glucuronide      | =  | ++ |
| X- $\beta$ - D-Glucuronide       | =  | +  |
| X- $\beta$ -D-Galactosaminide    | =  | +  |
| X- $\alpha$ -D-Mannoside         | =  | ++ |
| X-PO <sub>4</sub>                | =  | +  |
| X-SO <sub>4</sub>                | +  | ++ |

---

"+" and "-" indicates the ability (or not) of the strain to actively grow and reduce the redox dye present in the well, in presence of the different stresses: "++" strong positive, "+" positive, "-" negative.
