# Supplementary material for: Phenotypic Characterization and Draft Genome Sequence Analyses of Two Novel Endospore-Forming Sporosarcina spp. Isolated from Canada Goose (Branta canadensis) Feces
Source: Microorganisms. 2023 Dec 29;12(1):70. doi: 10.3390/microorganisms12010070 (PMC10818898; doi:10.3390/microorganisms12010070)
Supplement: Supplementary file 1 [file microorganisms-12-00070-s001.zip]

Archive with 5 entries (5 files):
- Keshri et al. Figure S2.pdf
- Keshri et al. Table S1.pdf
- Keshri et al. Table S2.xlsx
- Keshri et al. Table S3.xlsx
- Keshri et al. Figure S1.pdf
