# Supplementary material for: Phenotypic Characterization and Draft Genome Sequence Analyses of Two Novel Endospore-Forming Sporosarcina spp. Isolated from Canada Goose (Branta canadensis) Feces
Source: Microorganisms. 2023 Dec 29;12(1):70. doi: 10.3390/microorganisms12010070 (PMC10818898; doi:10.3390/microorganisms12010070)
Supplement: Supplementary file 1 [file microorganisms-12-00070-s001.zip › Keshri et al. Table S2.xlsx]

## Sheet: Sheet1
COG ID	COG Name	Sporosarcina sp. A4	Sporosarcina sp. A15	Sporosarcina newyorkensis 2681	Sporosarcina newyorkensis DSM 23543	Sporosarcina ureae DSM 2281	Sporosarcina ureae P17a	Sporosarcina ureae P37	Sporosarcina ureae S204			COG found in A4 but absent from close references				COG found in A15 but absent from close references
COG0477	MFS family permease	48	49	0	0	0	0	0	0			COG ID	COG Name	Sporosarcina sp. A4		COG ID	COG Name	Sporosarcina sp. A15
COG0840	Methyl-accepting chemotaxis protein	24	30	12	13	8	9	9	8			COG0477	MFS family permease	48		COG0477	MFS family permease	49
COG1595	DNA-directed RNA polymerase specialized sigma subunit, sigma24 family	23	0	18	17	8	9	6	8			COG0457	Tetratricopeptide (TPR) repeat	8		COG0457	Tetratricopeptide (TPR) repeat	8
COG0745	DNA-binding response regulator, OmpR family, contains REC and winged-helix (wHTH) domain	19	15	13	13	11	13	12	11			COG0577	ABC-type antimicrobial peptide transport system, permease component	7		COG0577	ABC-type antimicrobial peptide transport system, permease component	7
COG0642	Signal transduction histidine kinase	18	15	12	12	10	13	7	10			COG0454	N-acetyltransferase, GNAT superfamily (includes histone acetyltransferase HPA2)	5		COG0582	Integrase	6
COG1309	DNA-binding transcriptional regulator, AcrR family	17	0	16	16	11	12	8	11			COG0500	SAM-dependent methyltransferase	5		COG0784	CheY chemotaxis protein or a CheY-like REC (receiver) domain	6
COG1593	TRAP-type C4-dicarboxylate transport system, large permease component	14	8	4	4	4	4	4	4			COG3212	Uncharacterized membrane protein YkoI	5		COG3212	Uncharacterized membrane protein YkoI	6
COG1638	TRAP-type C4-dicarboxylate transport system, periplasmic component	14	7	5	5	5	5	6	5			COG0784	CheY chemotaxis protein or a CheY-like REC (receiver) domain	3		COG0500	SAM-dependent methyltransferase	5
COG3090	TRAP-type C4-dicarboxylate transport system, small permease component	14	7	4	4	5	4	2	5			COG1290	Cytochrome b subunit of the bc complex	3		COG1070	Sugar (pentulose or hexulose) kinase	5
COG0583	DNA-binding transcriptional regulator, LysR family	13	19	9	8	9	8	7	9			COG1478	F420-0:Gamma-glutamyl ligase (F420 biosynthesis)	3		COG2202	PAS domain	4
COG0697	Permease of the drug/metabolite transporter (DMT) superfamily	13	11	5	3	3	4	4	3			COG1996	DNA-directed RNA polymerase, subunit RPC12/RpoP, contains C4-type Zn-finger	3		COG0454	N-acetyltransferase, GNAT superfamily (includes histone acetyltransferase HPA2)	3
COG1191	DNA-directed RNA polymerase specialized sigma subunit	12	9	6	6	6	6	6	6			COG2140	Oxalate decarboxylase/archaeal phosphoglucose isomerase, cupin superfamily	3		COG0474	Magnesium-transporting ATPase (P-type)	3
COG1670	Protein N-acetyltransferase, RimJ/RimL family	12	0	4	3	6	7	4	6			COG2194	Phosphoethanolamine transferase for periplasmic glucans (OPG), alkaline phosphatase superfamily	3		COG1112	Superfamily I DNA and/or RNA helicase	3
COG1846	DNA-binding transcriptional regulator, MarR family	12	13	9	8	9	8	9	8			COG3118	Negative regulator of GroEL, contains thioredoxin-like and TPR-like domains	3		COG1478	F420-0:Gamma-glutamyl ligase (F420 biosynthesis)	3
COG4974	Site-specific recombinase XerD	11	0	8	7	6	3	10	6			COG3227	Zn-dependent metalloprotease	3		COG3118	Negative regulator of GroEL, contains thioredoxin-like and TPR-like domains	3
COG0601	ABC-type dipeptide/oligopeptide/nickel transport system, permease component	10	0	8	7	3	3	3	3			COG3379	Predicted phosphohydrolase or phosphomutase, AlkP superfamily	3		COG3379	Predicted phosphohydrolase or phosphomutase, AlkP superfamily	3
COG2199	GGDEF domain, diguanylate cyclase (c-di-GMP synthetase) or its enzymatically inactive variants	10	11	4	4	6	4	5	6			COG3613	Nucleoside 2-deoxyribosyltransferase	3		COG3620	Predicted transcriptional regulator with C-terminal CBS domains	3
COG0456	Ribosomal protein S18 acetylase RimI and related acetyltransferases	9	0	5	5	4	3	3	4			COG0145	N-methylhydantoinase A/oxoprolinase/acetone carboxylase, beta subunit	2		COG3941	Phage tail tape-measure protein, controls tail length	3
COG0492	Thioredoxin reductase	9	9	6	7	8	8	7	7			COG0375	Zn finger protein HypA/HybF (possibly regulating hydrogenase expression)	2		COG5492	Uncharacterized conserved protein YjdB, contains Ig-like domain	3
COG0596	Pimeloyl-ACP methyl ester carboxylesterase	9	8	6	6	3	6	2	3			COG0464	AAA+-type ATPase, SpoVK/Ycf46/Vps4 family	2		COG0341	Preprotein translocase subunit SecF	2
COG1335	Nicotinamidase-related amidase	9	0	3	3	2	2	2	2			COG0501	Zn-dependent protease with chaperone function	2		COG0375	Zn finger protein HypA/HybF (possibly regulating hydrogenase expression)	2
COG1366	Anti-anti-sigma regulatory factor (antagonist of anti-sigma factor)	9	9	6	6	7	5	7	6			COG0535	Radical SAM superfamily enzyme, MoaA/NifB/PqqE/SkfB family	2		COG0464	AAA+-type ATPase, SpoVK/Ycf46/Vps4 family	2
COG1396	Transcriptional regulator, contains XRE-family HTH domain	9	11	1	3	0	0	3	0			COG0582	Integrase	2		COG0475	Kef-type K+ transport system, membrane component KefB	2
COG1473	Metal-dependent amidase/aminoacylase/carboxypeptidase	9	7	6	5	5	5	4	5			COG1112	Superfamily I DNA and/or RNA helicase	2		COG0666	Ankyrin repeat	2
COG2217	Cation transport ATPase	9	0	7	7	3	7	6	3			COG1118	ABC-type sulfate/molybdate transport systems, ATPase component	2		COG0826	Collagenase-like protease, PrtC family	2
COG0457	Tetratricopeptide (TPR) repeat	8	8	0	0	0	0	0	0			COG1533	DNA repair photolyase	2		COG1118	ABC-type sulfate/molybdate transport systems, ATPase component	2
COG0591	Na+/proline symporter	8	4	3	2	1	2	2	1			COG1579	Predicted nucleic acid-binding protein, contains Zn-ribbon domain	2		COG1233	Phytoene dehydrogenase-related protein	2
COG0624	Acetylornithine deacetylase/Succinyl-diaminopimelate desuccinylase or related deacylase	8	8	5	4	2	3	4	2			COG1594	DNA-directed RNA polymerase, subunit M/Transcription elongation factor TFIIS	2		COG1240	Mg-chelatase subunit ChlD	2
COG1132	ABC-type multidrug transport system, ATPase and permease component	8	0	7	6	7	7	6	7			COG1654	Biotin operon repressor	2		COG1594	DNA-directed RNA polymerase, subunit M/Transcription elongation factor TFIIS	2
COG1196	Chromosome segregation ATPase	8	6	1	2	1	1	1	1			COG1698	Uncharacterized protein, UPF0147 family	2		COG1645	Uncharacterized Zn-finger containing protein, UPF0148 family	2
COG2076	Multidrug transporter EmrE and related cation transporters	8	0	7	7	4	4	4	4			COG1749	Flagellar hook protein FlgE	2		COG1730	Prefoldin subunit 5	2
COG0346	Catechol 2,3-dioxygenase or other lactoylglutathione lyase family enzyme	7	11	1	2	6	4	4	6			COG1753	Predicted antitoxin, CopG family	2		COG1749	Flagellar hook protein FlgE	2
COG0577	ABC-type antimicrobial peptide transport system, permease component	7	7	0	0	0	0	0	0			COG2185	Methylmalonyl-CoA mutase, C-terminal domain/subunit (cobalamin-binding)	2		COG1983	Phage shock protein PspC (stress-responsive transcriptional regulator)	2
COG1414	DNA-binding transcriptional regulator, IclR family	7	0	4	5	6	5	3	6			COG2246	Putative flippase GtrA (transmembrane translocase of bactoprenol-linked glucose)	2		COG1998	Ribosomal protein S27AE	2
COG1511	Uncharacterized membrane protein YhgE, phage infection protein (PIP) family	7	6	3	3	2	2	2	2			COG2456	Uncharacterized protein	2		COG2074	2-phosphoglycerate kinase	2
COG2165	Type II secretory pathway, pseudopilin PulG	7	5	2	1	1	1	1	1			COG2771	DNA-binding transcriptional regulator, CsgD family	2		COG2185	Methylmalonyl-CoA mutase, C-terminal domain/subunit (cobalamin-binding)	2
COG2197	DNA-binding response regulator, NarL/FixJ family, contains REC and HTH domains	7	5	4	4	4	4	4	4			COG3355	Predicted transcriptional regulator	2		COG2194	Phosphoethanolamine transferase for periplasmic glucans (OPG), alkaline phosphatase superfamily	2
COG4948	L-alanine-DL-glutamate epimerase or related enzyme of enolase superfamily	7	6	2	3	5	4	5	4			COG3366	Uncharacterized protein	2		COG2378	Predicted DNA-binding transcriptional regulator YafY, contains an HTH and WYL domains	2
COG0129	Dihydroxyacid dehydratase/phosphogluconate dehydratase	6	0	1	1	2	1	1	2			COG3596	Predicted GTPase	2		COG2426	Uncharacterized membrane protein	2
COG0154	Asp-tRNAAsn/Glu-tRNAGln amidotransferase A subunit or related amidase	6	0	4	4	3	3	1	3			COG3711	Transcriptional antiterminator	2		COG2771	DNA-binding transcriptional regulator, CsgD family	2
COG0494	8-oxo-dGTP pyrophosphatase MutT and related house-cleaning NTP pyrophosphohydrolases, NUDIX family	6	4	2	2	1	1	2	1			COG3945	Hemerythrin-like domain	2		COG2940	SET domain-containing protein (function unknown)	2
COG0526	Thiol-disulfide isomerase or thioredoxin	6	5	2	2	2	1	2	2			COG4003	Uncharacterized protein	2		COG3366	Uncharacterized protein	2
COG0607	Rhodanese-related sulfurtransferase	6	8	3	4	4	5	5	4			COG4146	Uncharacterized membrane permease YidK, sodium:solute symporter family	2		COG3435	Gentisate 1,2-dioxygenase	2
COG0675	Transposase	6	0	1	1	1	1	0	1			COG4185	Predicted ABC-type ATPase	2		COG3552	Uncharacterized conserved protein, contains von Willebrand factor type A (vWA) domain	2
COG0679	Predicted permease	6	3	2	2	2	2	1	2			COG4219	Signal transducer regulating beta-lactamase production, contains metallopeptidase domain	2		COG3878	Uncharacterized protein YwqG	2
COG1122	Energy-coupling factor transporter ATP-binding protein EcfA2	6	6	2	2	2	2	2	2			COG4408	Uncharacterized protein	2		COG3945	Hemerythrin-like domain	2
COG1228	Imidazolonepropionase or related amidohydrolase	6	8	4	5	0	0	0	0			COG4939	Major membrane immunogen, membrane-anchored lipoprotein	2		COG4282	Cell wall assembly regulator SMI1	2
COG1250	3-hydroxyacyl-CoA dehydrogenase	6	6	3	4	5	5	2	5			COG5564	Predicted TIM-barrel enzyme	2		COG4512	Accessory gene regulator protein AgrB	2
COG1344	Flagellin and related hook-associated protein FlgL	6	9	2	1	1	1	0	1			COG5567	Predicted small periplasmic lipoprotein YifL (function unknown0	2		COG4770	Acetyl/propionyl-CoA carboxylase, alpha subunit	2
COG2207	AraC-type DNA-binding domain and AraC-containing proteins	6	0	4	4	1	2	1	1			COG5605	Cytochrome c oxidase subunit IV	2		COG4808	Uncharacterized lipoprotein YehR, DUF1307 family	2
COG2972	Sensor histidine kinase YesM	6	2	1	0	0	0	0	0			COG0117	Pyrimidine deaminase domain of riboflavin biosynthesis protein RibD	1		COG4858	Uncharacterized membrane-anchored protein	2
COG3829	Transcriptional regulator containing PAS, AAA-type ATPase, and DNA-binding Fis domains	6	7	4	5	3	3	3	3			COG0140	Phosphoribosyl-ATP pyrophosphohydrolase	1		COG0070	Glutamate synthase domain 3	1
COG4608	ABC-type oligopeptide transport system, ATPase component	6	6	3	3	1	1	1	1			COG0163	3-polyprenyl-4-hydroxybenzoate decarboxylase	1		COG0117	Pyrimidine deaminase domain of riboflavin biosynthesis protein RibD	1
COG5002	Signal transduction histidine kinase	6	5	3	3	3	3	4	3			COG0341	Preprotein translocase subunit SecF	1		COG0140	Phosphoribosyl-ATP pyrophosphohydrolase	1
COG0079	Histidinol-phosphate/aromatic aminotransferase or cobyric acid decarboxylase	5	0	4	4	3	3	3	3			COG0348	Polyferredoxin	1		COG0163	3-polyprenyl-4-hydroxybenzoate decarboxylase	1
COG0111	Phosphoglycerate dehydrogenase or related dehydrogenase	5	0	2	2	4	2	2	4			COG0382	4-hydroxybenzoate polyprenyltransferase	1		COG0382	4-hydroxybenzoate polyprenyltransferase	1
COG0119	Isopropylmalate/homocitrate/citramalate synthases	5	4	3	3	3	2	2	3			COG0432	Thiamin phosphate synthase YjbQ, UPF0047 family	1		COG0449	Glucosamine 6-phosphate synthetase, contains amidotransferase and phosphosugar isomerase domains	1
COG0209	Ribonucleotide reductase alpha subunit	5	0	3	3	1	1	2	1			COG0449	Glucosamine 6-phosphate synthetase, contains amidotransferase and phosphosugar isomerase domains	1		COG0518	GMP synthase - Glutamine amidotransferase domain	1
COG0454	N-acetyltransferase, GNAT superfamily (includes histone acetyltransferase HPA2)	5	3	0	0	0	0	0	0			COG0474	Magnesium-transporting ATPase (P-type)	1		COG0555	ABC-type sulfate transport system, permease component	1
COG0500	SAM-dependent methyltransferase	5	5	0	0	0	0	0	0			COG0475	Kef-type K+ transport system, membrane component KefB	1		COG0602	Organic radical activating enzyme	1
COG0516	IMP dehydrogenase/GMP reductase	5	4	2	2	2	2	2	2			COG0518	GMP synthase - Glutamine amidotransferase domain	1		COG0685	5,10-methylenetetrahydrofolate reductase	1
COG0561	Hydroxymethylpyrimidine pyrophosphatase and other HAD family phosphatases	5	4	3	3	2	3	3	2			COG0555	ABC-type sulfate transport system, permease component	1		COG0741	Soluble lytic murein transglycosylase and related regulatory proteins (some contain LysM/invasin domains)	1
COG0730	Uncharacterized membrane protein YfcA	5	0	4	4	3	3	3	3			COG0633	Ferredoxin	1		COG0748	Putative heme iron utilization protein	1
COG0755	ABC-type transport system involved in cytochrome c biogenesis, permease component	5	6	3	3	2	3	3	2			COG0654	2-polyprenyl-6-methoxyphenol hydroxylase and related FAD-dependent oxidoreductases	1		COG0807	GTP cyclohydrolase II	1
COG0772	Bacterial cell division protein FtsW, lipid II flippase	5	5	2	3	3	3	3	3			COG0685	5,10-methylenetetrahydrofolate reductase	1		COG0815	Apolipoprotein N-acyltransferase	1
COG1073	Fermentation-respiration switch protein FrsA, has esterase activity, DUF1100 family	5	0	3	3	3	4	2	3			COG0720	6-pyruvoyl-tetrahydropterin synthase	1		COG0823	Periplasmic component of the Tol biopolymer transport system	1
COG1266	Membrane protease YdiL, CAAX protease family	5	0	1	1	3	2	2	3			COG0741	Soluble lytic murein transglycosylase and related regulatory proteins (some contain LysM/invasin domains)	1		COG0828	Ribosomal protein S21	1
COG1959	DNA-binding transcriptional regulator, IscR family	5	0	3	3	3	3	2	3			COG0748	Putative heme iron utilization protein	1		COG1034	NADH dehydrogenase/NADH:ubiquinone oxidoreductase 75 kD subunit (chain G)	1
COG2186	DNA-binding transcriptional regulator, FadR family	5	0	4	2	3	3	1	3			COG0807	GTP cyclohydrolase II	1		COG1069	Ribulose kinase	1
COG2200	EAL domain, c-di-GMP-specific phosphodiesterase class I (or its enzymatically inactive variant)	5	7	3	3	3	3	3	3			COG0828	Ribosomal protein S21	1		COG1262	Formylglycine-generating enzyme, required for sulfatase activity, contains SUMF1/FGE domain	1
COG2721	Altronate dehydratase	5	0	1	0	2	0	0	2			COG1022	Long-chain acyl-CoA synthetase (AMP-forming)	1		COG1279	Arginine exporter protein ArgO	1
COG3212	Uncharacterized membrane protein YkoI	5	6	0	0	0	0	0	0			COG1070	Sugar (pentulose or hexulose) kinase	1		COG1287	Asparagine N-glycosylation enzyme, membrane subunit Stt3	1
COG3314	Uncharacterized membrane protein YjiH, contains nucleoside recognition GATE domain	5	0	4	3	1	1	1	1			COG1100	GTPase SAR1 family domain	1		COG1289	Uncharacterized membrane protein YccC	1
COG3729	General stress protein YciG, contains tandem KGG domains	5	3	0	0	1	1	1	1			COG1134	ABC-type polysaccharide/polyol phosphate transport system, ATPase component	1		COG1290	Cytochrome b subunit of the bc complex	1
COG4929	Uncharacterized membrane-anchored protein	5	0	1	1	1	1	2	1			COG1223	Predicted ATPase, AAA+ superfamily	1		COG1343	CRISPR/Cas system-associated endoribonuclease Cas2	1
COG0086	DNA-directed RNA polymerase, beta' subunit/160 kD subunit	4	3	1	1	1	1	1	1			COG1251	NAD(P)H-nitrite reductase, large subunit	1		COG1388	LysM repeat	1
COG0265	Periplasmic serine protease, S1-C subfamily, contain C-terminal PDZ domain	4	3	2	2	1	1	1	1			COG1263	Phosphotransferase system IIC components, glucose/maltose/N-acetylglucosamine-specific	1		COG1451	Predicted metal-dependent hydrolase	1
COG0329	Dihydrodipicolinate synthase/N-acetylneuraminate lyase	4	0	2	2	3	2	3	3			COG1273	Non-homologous end joining protein Ku, dsDNA break repair	1		COG1468	CRISPR/Cas system-associated exonuclease Cas4, RecB family	1
COG0342	Preprotein translocase subunit SecD	4	4	1	1	1	1	1	1			COG1275	Tellurite resistance protein TehA and related permeases	1		COG1518	CRISPR/Cas system-associated endonuclease Cas1	1
COG0420	DNA repair exonuclease SbcCD nuclease subunit	4	0	2	2	2	2	2	2			COG1289	Uncharacterized membrane protein YccC	1		COG1533	DNA repair photolyase	1
COG0425	TusA-related sulfurtransferase	4	3	1	1	2	1	1	2			COG1300	Uncharacterized membrane protein SpoIIM, required for sporulation	1		COG1546	Nicotinamide mononucleotide (NMN) deamidase PncC	1
COG0503	Adenine/guanine phosphoribosyltransferase or related PRPP-binding protein	4	4	3	3	3	3	3	3			COG1328	Anaerobic ribonucleoside-triphosphate reductase	1		COG1613	ABC-type sulfate transport system, periplasmic component	1
COG0527	Aspartokinase	4	3	1	1	1	1	1	1			COG1450	Type II secretory pathway component GspD/PulD (secretin)	1		COG1654	Biotin operon repressor	1
COG0542	ATP-dependent Clp protease ATP-binding subunit ClpA	4	0	3	3	2	2	2	2			COG1501	Alpha-glucosidase, glycosyl hydrolase family GH31	1		COG1708	Predicted nucleotidyltransferase	1
COG0550	DNA topoisomerase IA	4	8	3	3	3	3	3	3			COG1546	Nicotinamide mononucleotide (NMN) deamidase PncC	1		COG1709	Predicted transcriptional regulator	1
COG0604	NADPH:quinone reductase or related Zn-dependent oxidoreductase	4	0	3	3	3	3	2	3			COG1613	ABC-type sulfate transport system, periplasmic component	1		COG1719	Predicted hydrocarbon binding protein, contains 4VR domain	1
COG0706	Membrane protein insertase Oxa1/YidC/SpoIIIJ, required for the localization of integral membrane proteins	4	4	2	1	1	1	1	1			COG1625	Fe-S oxidoreductase, related to NifB/MoaA family	1		COG1735	Predicted metal-dependent hydrolase, phosphotriesterase family	1
COG0737	2',3'-cyclic-nucleotide 2'-phosphodiesterase/5'- or 3'-nucleotidase, 5'-nucleotidase family	4	0	3	3	2	2	2	2			COG1696	D-alanyl-lipoteichoic acid acyltransferase DltB, MBOAT superfamily	1		COG1865	Adenosylcobinamide amidohydrolase	1
COG0793	C-terminal processing protease CtpA/Prc, contains a PDZ domain	4	4	2	2	2	2	2	2			COG1719	Predicted hydrocarbon binding protein, contains 4VR domain	1		COG1886	Flagellar motor switch/type III secretory pathway protein FliN	1
COG0843	Heme/copper-type cytochrome/quinol oxidase, subunit 1	4	0	3	2	2	3	3	2			COG1724	Predicted RNA binding protein YcfA, dsRBD-like fold, HicA-like mRNA interferase family	1		COG1912	S-adenosylmethionine hydrolase (SAM-hydroxide adenosyltransferase)	1
COG0846	NAD-dependent protein deacetylase, SIR2 family	4	3	1	1	1	1	1	1			COG1730	Prefoldin subunit 5	1		COG1957	Inosine-uridine nucleoside N-ribohydrolase	1
COG1071	TPP-dependent pyruvate or acetoin dehydrogenase subunit alpha	4	4	3	3	3	3	3	3			COG1762	Phosphotransferase system mannitol/fructose-specific IIA domain (Ntr-type)	1		COG1991	Uncharacterized protein, UPF0333 family	1
COG1174	ABC-type proline/glycine betaine transport system, permease component	4	0	0	0	1	1	1	1			COG1865	Adenosylcobinamide amidohydrolase	1		COG1996	DNA-directed RNA polymerase, subunit RPC12/RpoP, contains C4-type Zn-finger	1
COG1387	Histidinol phosphatase or related hydrolase of the PHP family	4	2	1	1	1	1	1	1			COG1886	Flagellar motor switch/type III secretory pathway protein FliN	1		COG2140	Oxalate decarboxylase/archaeal phosphoglucose isomerase, cupin superfamily	1
COG1419	Flagellar biosynthesis GTPase FlhF	4	2	1	1	1	1	1	1			COG1983	Phage shock protein PspC (stress-responsive transcriptional regulator)	1		COG2173	D-alanyl-D-alanine dipeptidase	1
COG1622	Heme/copper-type cytochrome/quinol oxidase, subunit 2	4	3	2	2	1	1	1	1			COG1997	Ribosomal protein L37AE/L43A	1		COG2193	Bacterioferritin (cytochrome b1)	1
COG1878	Kynurenine formamidase	4	0	2	2	1	1	1	1			COG2017	Galactose mutarotase or related enzyme	1		COG2205	K+-sensing histidine kinase KdpD	1
COG1929	Glycerate kinase	4	0	1	1	1	1	1	1			COG2115	Xylose isomerase	1		COG2247	Putative cell wall-binding domain	1
COG2226	Ubiquinone/menaquinone biosynthesis C-methylase UbiE	4	4	1	1	1	3	1	1			COG2205	K+-sensing histidine kinase KdpD	1		COG2314	Uncharacterized membrane protein YozV, TM2 domain	1
COG2252	Xanthine/uracil/vitamin C permease, AzgA family	4	5	2	2	2	2	2	2			COG2216	High-affinity K+ transport system, ATPase chain B	1		COG2336	Antitoxin component of the MazEF toxin-antitoxin module	1
COG2309	Leucyl aminopeptidase (aminopeptidase T)	4	2	1	1	1	1	1	1			COG2241	Precorrin-6B methylase 1	1		COG2385	Peptidoglycan hydrolase (amidase) enhancer domain	1
COG2318	Uncharacterized damage-inducible protein DinB (forms a four-helix bundle)	4	3	1	1	0	0	2	0			COG2247	Putative cell wall-binding domain	1		COG2407	L-fucose isomerase or related protein	1
COG2340	Uncharacterized conserved protein YkwD, contains CAP (CSP/antigen 5/PR1) domain	4	4	3	3	2	2	2	2			COG2274	ABC-type bacteriocin/lantibiotic exporters, contain an N-terminal double-glycine peptidase domain	1		COG2411	Uncharacterized protein	1
COG3279	DNA-binding response regulator, LytR/AlgR family	4	3	2	1	1	1	1	1			COG2301	Citrate lyase beta subunit	1		COG2433	Possible nuclease of RNase H fold, RuvC/YqgF family	1
COG4585	Signal transduction histidine kinase	4	5	2	2	3	2	3	3			COG2314	Uncharacterized membrane protein YozV, TM2 domain	1		COG2450	Predicted archaeal cell division protein, SepF homolog, DUF552 family	1
COG5001	Predicted signal transduction protein containing a membrane domain, an EAL and a GGDEF domain	4	0	0	0	0	3	1	2			COG2336	Antitoxin component of the MazEF toxin-antitoxin module	1		COG2813	16S rRNA G1207 methylase RsmC	1
COG0044	Dihydroorotase or related cyclic amidohydrolase	3	2	1	1	1	1	1	1			COG2370	Hydrogenase/urease accessory protein HupE	1		COG2867	Ribosome association toxin PasT (RatA) of the RatAB toxin-antitoxin module	1
COG0073	tRNA-binding EMAP/Myf domain	3	2	1	1	1	1	1	1			COG2385	Peptidoglycan hydrolase (amidase) enhancer domain	1		COG2881	Uncharacterized protein	1
COG0188	DNA gyrase/topoisomerase IV, subunit A	3	0	2	2	2	2	2	2			COG2407	L-fucose isomerase or related protein	1		COG2888	Predicted RNA-binding protein involved in translation, contains Zn-ribbon domain, DUF1610 family	1
COG0191	Fructose/tagatose bisphosphate aldolase	3	3	1	2	1	1	1	1			COG2411	Uncharacterized protein	1		COG2943	Membrane glycosyltransferase	1
COG0205	6-phosphofructokinase	3	0	1	1	1	1	1	1			COG2426	Uncharacterized membrane protein	1		COG2966	Uncharacterized membrane protein YjjP, DUF1212 family	1
COG0234	Co-chaperonin GroES (HSP10)	3	0	1	1	1	2	1	1			COG2524	Predicted transcriptional regulator, contains C-terminal CBS domains	1		COG3052	Citrate lyase, gamma subunit	1
COG0239	Fluoride ion exporter CrcB/FEX, affects chromosome condensation	3	0	2	2	2	2	2	2			COG2770	HAMP domain	1		COG3103	Uncharacterized conserved protein YgiM, contains N-terminal SH3 domain, DUF1202 family	1
COG0247	Fe-S oxidoreductase	3	3	2	2	1	1	2	1			COG2813	16S rRNA G1207 methylase RsmC	1		COG3105	Uncharacterized membrane-anchored protein YhcB, DUF1043 family	1
COG0333	Ribosomal protein L32	3	0	1	1	1	1	1	1			COG2815	PASTA domain, binds beta-lactams	1		COG3158	K+ transporter	1
COG0400	Predicted esterase	3	4	2	2	2	2	2	2			COG2846	Iron-sulfur cluster repair protein YtfE, RIC family, contains ScdAN and hemerythrin domains	1		COG3167	Tfp pilus assembly protein PilO	1
COG0423	Glycyl-tRNA synthetase (class II)	3	3	1	1	1	1	1	1			COG2888	Predicted RNA-binding protein involved in translation, contains Zn-ribbon domain, DUF1610 family	1		COG3180	Uncharacterized membrane protein AbrB, regulator of aidB expression	1
COG0431	NAD(P)H-dependent FMN reductase	3	5	2	1	2	2	1	2			COG2900	Uncharacterized coiled-coil protein SlyX (sensitive to lysis X)	1		COG3185	4-hydroxyphenylpyruvate dioxygenase and related hemolysins	1
COG0458	Carbamoylphosphate synthase large subunit	3	0	2	1	1	1	1	1			COG2940	SET domain-containing protein (function unknown)	1		COG3195	2-oxo-4-hydroxy-4-carboxy--5-ureidoimidazoline (OHCU) decarboxylase	1
COG0465	ATP-dependent Zn proteases	3	0	2	2	2	2	2	2			COG2942	Mannose or cellobiose epimerase, N-acyl-D-glucosamine 2-epimerase family	1		COG3231	Aminoglycoside phosphotransferase	1
COG0497	DNA repair ATPase RecN	3	0	1	1	1	1	1	1			COG3000	Sterol desaturase/sphingolipid hydroxylase, fatty acid hydroxylase superfamily	1		COG3256	Nitric oxide reductase large subunit	1
COG0514	Superfamily II DNA helicase RecQ	3	4	1	1	2	2	2	2			COG3002	Uncharacterized conserved protein YbcC, UPF0753/DUF2309 family	1		COG3293	Transposase	1
COG0530	Ca2+/Na+ antiporter	3	4	1	1	1	1	1	1			COG3056	Uncharacterized lipoprotein YajG	1		COG3300	MHYT domain, NO-binding membrane sensor	1
COG0553	Superfamily II DNA or RNA helicase, SNF2 family	3	0	1	2	1	1	1	1			COG3103	Uncharacterized conserved protein YgiM, contains N-terminal SH3 domain, DUF1202 family	1		COG3302	DMSO reductase anchor subunit	1
COG0584	Glycerophosphoryl diester phosphodiesterase	3	3	1	1	2	2	2	2			COG3115	Cell division protein ZipA, interacts with FtsZ	1		COG3347	Rhamnose utilisation protein RhaD, predicted bifunctional aldolase and dehydrogenase	1
COG0590	tRNA(Arg) A34 adenosine deaminase TadA	3	3	2	2	1	1	2	1			COG3123	Uncharacterized conserved protein YaiE, UPF0345 family	1		COG3369	Uncharacterized protein, contains Zn-finger domain of CDGSH type	1
COG0622	Predicted phosphodiesterase	3	4	2	2	2	2	2	2			COG3167	Tfp pilus assembly protein PilO	1		COG3409	Peptidoglycan-binding (PGRP) domain of peptidoglycan hydrolases	1
COG0662	Mannose-6-phosphate isomerase, cupin superfamily	3	2	1	1	1	1	1	1			COG3180	Uncharacterized membrane protein AbrB, regulator of aidB expression	1		COG3418	Flagellar biosynthesis/type III secretory pathway chaperone	1
COG0712	FoF1-type ATP synthase, delta subunit	3	0	1	1	1	1	1	1			COG3185	4-hydroxyphenylpyruvate dioxygenase and related hemolysins	1		COG3440	Predicted restriction endonuclease	1
COG0784	CheY chemotaxis protein or a CheY-like REC (receiver) domain	3	6	0	0	0	0	0	0			COG3202	ATP/ADP translocase	1		COG3462	Uncharacterized membrane protein	1
COG0800	2-keto-3-deoxy-6-phosphogluconate aldolase	3	0	1	1	1	0	0	1			COG3205	Uncharacterized membrane protein	1		COG3542	Predicted sugar epimerase, cupin superfamily	1
COG0804	Urease alpha subunit	3	0	1	1	1	1	1	1			COG3247	Uncharacterized membrane protein HdeD, DUF308 family	1		COG3555	Aspartyl/asparaginyl beta-hydroxylase, cupin superfamily	1
COG0829	Urease accessory protein UreH	3	0	1	1	1	1	1	1			COG3256	Nitric oxide reductase large subunit	1		COG3560	Fatty acid repression mutant protein (predicted oxidoreductase)	1
COG0842	ABC-type multidrug transport system, permease component	3	2	1	1	0	0	0	0			COG3264	Small-conductance mechanosensitive channel	1		COG3561	Phage anti-repressor protein	1
COG0847	DNA polymerase III, epsilon subunit or related 3'-5' exonuclease	3	3	1	0	1	1	1	1			COG3278	Cbb3-type cytochrome oxidase, subunit 1	1		COG3597	Uncharacterized conserved protein, DUF697 family	1
COG1030	Membrane-bound serine protease (ClpP class)	3	2	1	1	1	1	1	1			COG3285	Eukaryotic-type DNA primase	1		COG3605	Signal transduction protein containing GAF and PtsI domains	1
COG1052	Lactate dehydrogenase or related 2-hydroxyacid dehydrogenase	3	0	2	2	2	2	1	2			COG3300	MHYT domain, NO-binding membrane sensor	1		COG3607	Predicted lactoylglutathione lyase	1
COG1125	ABC-type proline/glycine betaine transport system, ATPase component	3	0	1	1	2	2	2	2			COG3311	Predicted DNA-binding transcriptional regulator AlpA	1		COG3610	Uncharacterized membrane protein YjjB, DUF3815 family	1
COG1135	ABC-type methionine transport system, ATPase component	3	0	1	1	2	2	2	2			COG3353	Archaellum component FlaF, FlaF/FlaG flagellin family	1		COG3649	CRISPR/Cas system type I-B associated protein Csh2, Cas7 group, RAMP superfamily	1
COG1159	GTPase Era, involved in 16S rRNA processing	3	0	1	1	1	1	1	1			COG3367	Uncharacterized conserved protein, NAD-dependent epimerase/dehydratase family	1		COG3653	N-acyl-D-aspartate/D-glutamate deacylase	1
COG1252	NADH dehydrogenase, FAD-containing subunit	3	0	2	2	2	2	2	2			COG3393	Predicted acetyltransferase, GNAT family	1		COG3654	Prophage maintenance system killer protein	1
COG1277	ABC-type transport system involved in multi-copper enzyme maturation, permease component	3	3	1	1	1	2	1	1			COG3411	(2Fe-2S) ferredoxin	1		COG3708	Predicted transcriptional regulator YdeE, contains AraC-type DNA-binding domain	1
COG1280	Threonine/homoserine/homoserine lactone efflux protein	3	0	1	1	1	1	1	1			COG3414	Phosphotransferase system, galactitol-specific IIB component	1		COG3711	Transcriptional antiterminator	1
COG1290	Cytochrome b subunit of the bc complex	3	1	0	0	0	0	0	0			COG3415	Transposase	1		COG3751	Proline 4-hydroxylase (includes Rps23 Pro-64 3,4-dihydroxylase Tpa1), contains SM-20 domain	1
COG1295	Uncharacterized membrane protein, BrkB/YihY/UPF0761 family (not an RNase)	3	0	2	2	2	2	2	2			COG3417	Outer membrane lipoprotein LpoB, binds and activates PBP1b	1		COG3758	Various environmental stresses-induced protein Ves (function unknown)	1
COG1392	Uncharacterized conserved protein YkaA, distantly related to PhoU, UPF0111/DUF47 family	3	0	1	1	1	1	1	1			COG3418	Flagellar biosynthesis/type III secretory pathway chaperone	1		COG3783	Soluble cytochrome b562	1
COG1408	Predicted phosphohydrolase, MPP superfamily	3	0	1	2	1	1	2	1			COG3462	Uncharacterized membrane protein	1		COG3825	Uncharacterized conserved protein, contains von Willebrand factor type A (vWA) domain	1
COG1457	Purine-cytosine permease or related protein	3	0	2	2	1	1	1	1			COG3473	Maleate cis-trans isomerase	1		COG3830	ACT domain, binds amino acids and other small ligands	1
COG1478	F420-0:Gamma-glutamyl ligase (F420 biosynthesis)	3	3	0	0	0	0	0	0			COG3493	Na+/citrate or Na+/malate symporter	1		COG3848	Phosphohistidine swiveling domain of PEP-utilizing enzymes	1
COG1488	Nicotinic acid phosphoribosyltransferase	3	2	1	1	1	1	1	1			COG3521	Predicted component of the type VI protein secretion system	1		COG3852	Signal transduction histidine kinase, nitrogen specific	1
COG1512	Uncharacterized membrane protein YgcG, contains a TPM-fold domain	3	3	1	1	1	1	1	1			COG3542	Predicted sugar epimerase, cupin superfamily	1		COG3874	Uncharacterized spore protein YtfJ	1
COG1516	Flagellin-specific chaperone FliS	3	0	2	2	1	1	2	1			COG3560	Fatty acid repression mutant protein (predicted oxidoreductase)	1		COG3943	Uncharacterized conserved protein	1
COG1732	Periplasmic glycine betaine/choline-binding (lipo)protein of an ABC-type transport system (osmoprotectant binding protein)	3	0	1	1	2	2	2	2			COG3593	Predicted ATP-dependent endonuclease of the OLD family, contains P-loop ATPase and TOPRIM domains	1		COG4027	3'-phosphoadenosine 5'-phosphosulfate sulfotransferase	1
COG1760	L-serine deaminase	3	2	0	0	1	1	1	1			COG3597	Uncharacterized conserved protein, DUF697 family	1		COG4106	Trans-aconitate methyltransferase	1
COG1826	Sec-independent protein translocase protein TatA	3	0	0	0	1	2	0	1			COG3602	Uncharacterized protein	1		COG4154	L-fucose mutarotase/ribose pyranase, RbsD/FucU family	1
COG1847	Predicted RNA-binding protein Jag, conains KH and R3H domains	3	2	1	1	1	0	0	1			COG3605	Signal transduction protein containing GAF and PtsI domains	1		COG4194	Uncharacterized membrane protein	1
COG1854	S-ribosylhomocysteine lyase LuxS, autoinducer biosynthesis	3	0	2	2	2	1	1	2			COG3607	Predicted lactoylglutathione lyase	1		COG4196	Uncharacterized conserved protein, DUF2126 family	1
COG1884	Methylmalonyl-CoA mutase, N-terminal domain/subunit	3	0	2	2	2	2	2	2			COG3619	Uncharacterized membrane protein YoaK, UPF0700 family	1		COG4199	ssDNA-specific exonuclease RecJ	1
COG1914	Mn2+ and Fe2+ transporters of the NRAMP family	3	3	2	2	2	1	2	2			COG3620	Predicted transcriptional regulator with C-terminal CBS domains	1		COG4208	ABC-type sulfate transport system, permease component	1
COG1917	Cupin domain protein related to quercetin dioxygenase	3	3	1	0	1	2	0	1			COG3653	N-acyl-D-aspartate/D-glutamate deacylase	1		COG4298	Uncharacterized protein	1
COG1943	REP element-mobilizing transposase RayT	3	0	0	0	2	1	2	2			COG3654	Prophage maintenance system killer protein	1		COG4372	Uncharacterized conserved protein, contains DUF3084 domain	1
COG1982	Arginine/lysine/ornithine decarboxylase	3	4	2	2	2	2	2	2			COG3693	Endo-1,4-beta-xylanase, GH35 family	1		COG4395	Predicted lipid-binding transport protein, Tim44 family	1
COG1988	Membrane-bound metal-dependent hydrolase YbcI, DUF457 family	3	3	2	1	1	1	1	1			COG3751	Proline 4-hydroxylase (includes Rps23 Pro-64 3,4-dihydroxylase Tpa1), contains SM-20 domain	1		COG4420	Uncharacterized membrane protein	1
COG1996	DNA-directed RNA polymerase, subunit RPC12/RpoP, contains C4-type Zn-finger	3	1	0	0	0	0	0	0			COG3758	Various environmental stresses-induced protein Ves (function unknown)	1		COG4449	Predicted protease, Abi (CAAX) family	1
COG2087	Adenosyl cobinamide kinase/adenosyl cobinamide phosphate guanylyltransferase	3	3	1	2	1	1	1	1			COG3775	Phosphotransferase system, galactitol-specific IIC component	1		COG4485	Uncharacterized membrane protein YfhO	1
COG2113	ABC-type proline/glycine betaine transport system, periplasmic component	3	3	1	2	1	2	1	1			COG3776	Uncharacterized conserved protein YhhL, DUF1145 family	1		COG4598	ABC-type histidine transport system, ATPase component	1
COG2140	Oxalate decarboxylase/archaeal phosphoglucose isomerase, cupin superfamily	3	1	0	0	0	0	0	0			COG3823	Glutamine cyclotransferase	1		COG4700	Uncharacterized protein	1
COG2194	Phosphoethanolamine transferase for periplasmic glucans (OPG), alkaline phosphatase superfamily	3	2	0	0	0	0	0	0			COG3830	ACT domain, binds amino acids and other small ligands	1		COG4726	Tfp pilus assembly protein PilX	1
COG2255	Holliday junction resolvasome RuvABC, ATP-dependent DNA helicase subunit	3	0	1	1	1	1	1	1			COG3836	2-keto-3-deoxy-L-rhamnonate aldolase RhmA	1		COG4729	Uncharacterized protein	1
COG2261	Uncharacterized membrane protein YeaQ/YmgE, transglycosylase-associated protein family	3	0	1	1	2	2	1	2			COG3848	Phosphohistidine swiveling domain of PEP-utilizing enzymes	1		COG4803	Uncharacterized membrane protein	1
COG2268	Uncharacterized membrane protein YqiK, contains Band7/PHB/SPFH domain	3	0	1	1	0	0	0	0			COG3874	Uncharacterized spore protein YtfJ	1		COG4876	Uncharacterized protein YdaT	1
COG2311	Uncharacterized membrane protein YeiB	3	3	1	1	1	1	1	1			COG3886	HKD family nuclease	1		COG4942	Septal ring factor EnvC, activator of murein hydrolases AmiA and AmiB	1
COG2327	Polysaccharide pyruvyl transferase family protein WcaK	3	0	1	1	1	1	1	1			COG3970	Fumarylacetoacetate (FAA) hydrolase family protein	1		COG4967	Tfp pilus assembly protein PilV	1
COG2337	mRNA-degrading endonuclease, toxin component of the MazEF toxin-antitoxin module	3	2	1	1	1	1	1	1			COG4042	Energy-converting hydrogenase Eha subunit A	1		COG4976	Predicted methyltransferase, contains TPR repeat	1
COG2409	Uncharacterized membrane protein YdfJ, MMPL/SSD domain	3	0	2	1	2	1	2	2			COG4096	Type I site-specific restriction endonuclease, part of a restriction-modification system	1		COG4990	Uncharacterized protein YvpB	1
COG3118	Negative regulator of GroEL, contains thioredoxin-like and TPR-like domains	3	3	0	0	0	0	0	0			COG4128	Zona occludens toxin, predicted ATPase	1		COG4991	Uncharacterized conserved protein YraI	1
COG3227	Zn-dependent metalloprotease	3	0	0	0	0	0	0	0			COG4199	ssDNA-specific exonuclease RecJ	1		COG5337	Spore coat protein CotH	1
COG3290	Sensor histidine kinase regulating citrate/malate metabolism	3	0	2	2	2	2	1	2			COG4208	ABC-type sulfate transport system, permease component	1		COG5373	Uncharacterized membrane protein	1
COG3379	Predicted phosphohydrolase or phosphomutase, AlkP superfamily	3	3	0	0	0	0	0	0			COG4213	ABC-type xylose transport system, periplasmic component	1		COG5378	Predicted nucleic acid-binding protein, contains PIN domain	1
COG3613	Nucleoside 2-deoxyribosyltransferase	3	0	0	0	0	0	0	0			COG4214	ABC-type xylose transport system, permease component	1		COG5395	Uncharacterized membrane protein	1
COG3835	Sugar diacid utilization regulator	3	3	1	1	1	2	1	1			COG4245	Uncharacterized conserved protein YegL, contains vWA domain of TerY type	1		COG5412	Phage-related protein	1
COG4129	Uncharacterized membrane protein YgaE, UPF0421/DUF939 family	3	0	1	1	2	2	2	2			COG4255	Uncharacterized protein	1		COG5472	Predicted small integral membrane protein	1
COG4193	Beta- N-acetylglucosaminidase	3	2	1	1	1	0	0	1			COG4267	Uncharacterized membrane protein	1		COG5483	Uncharacterized conserved protein, DUF488 family	1
COG4903	Competence transcription factor ComK	3	0	1	1	2	2	1	2			COG4276	Ligand-binding SRPBCC domain	1		COG5509	Uncharacterized small protein, DUF1192 family	1
COG4980	Gas vesicle protein	3	3	2	2	2	2	2	2			COG4317	Xanthosine utilization system component, XapX domain	1		COG5519	Uncharcterized protein, DUF927 family	1
COG5298	Uncharacterized protein YdaL	3	0	0	0	1	0	0	1			COG4333	Uncharacterized protein	1		COG5521	Maltodextrin utilization protein YvdJ (function unknown)	1
COG5386	Heme-binding NEAT domain	3	0	0	1	0	1	1	0			COG4391	Uncharacterized conserved protein, contains Zn-finger domain	1		COG5528	Uncharacterized membrane protein	1
COG0036	Pentose-5-phosphate-3-epimerase	2	0	1	1	1	1	1	1			COG4395	Predicted lipid-binding transport protein, Tim44 family	1		COG5566	Transcriptional regulator, Middle operon regulator (Mor) family	1
COG0046	Phosphoribosylformylglycinamidine (FGAM) synthase, synthetase domain	2	2	1	1	1	1	1	1			COG4449	Predicted protease, Abi (CAAX) family	1		COG5583	Uncharacterized protein	1
COG0060	Isoleucyl-tRNA synthetase	2	0	1	1	1	1	1	1			COG4539	Uncharacterized membrane protein YGL010W	1		COG5615	Uncharacterized membrane protein	1
COG0065	Homoaconitase/3-isopropylmalate dehydratase large subunit	2	0	1	1	1	1	1	1			COG4547	Cobalamin biosynthesis protein CobT (nicotinate-mononucleotide:5, 6-dimethylbenzimidazole phosphorib...	1		COG5652	VanZ like family protein (function unknown)	1
COG0066	3-isopropylmalate dehydratase small subunit	2	0	1	1	1	1	1	1			COG4674	ABC-type uncharacterized transport system, ATPase component	1
COG0085	DNA-directed RNA polymerase, beta subunit/140 kD subunit	2	2	1	1	1	1	1	1			COG4679	Phage-related protein	1
COG0088	Ribosomal protein L4	2	0	1	1	1	1	1	1			COG4692	Predicted neuraminidase (sialidase)	1
COG0130	tRNA U55 pseudouridine synthase TruB, may also work on U342 of tmRNA	2	0	1	1	1	1	1	1			COG4700	Uncharacterized protein	1
COG0136	Aspartate-semialdehyde dehydrogenase	2	0	1	1	1	1	1	1			COG4709	Uncharacterized membrane protein	1
COG0138	AICAR transformylase/IMP cyclohydrolase PurH	2	0	1	1	1	1	1	1			COG4723	Phage-related protein, tail component	1
COG0145	N-methylhydantoinase A/oxoprolinase/acetone carboxylase, beta subunit	2	0	0	0	0	0	0	0			COG4726	Tfp pilus assembly protein PilX	1
COG0148	Enolase	2	0	1	1	1	1	1	1			COG4729	Uncharacterized protein	1
COG0149	Triosephosphate isomerase	2	0	1	1	1	1	1	1			COG4770	Acetyl/propionyl-CoA carboxylase, alpha subunit	1
COG0152	Phosphoribosylaminoimidazole-succinocarboxamide synthase	2	0	1	1	1	1	1	1			COG4803	Uncharacterized membrane protein	1
COG0162	Tyrosyl-tRNA synthetase	2	0	1	1	1	1	1	1			COG4821	Uncharacterized protein, contains SIS (Sugar ISomerase) phosphosugar binding domain	1
COG0176	Transaldolase	2	0	1	1	1	1	1	1			COG4826	Serine protease inhibitor	1
COG0186	Ribosomal protein S17	2	0	1	1	1	1	1	1			COG4876	Uncharacterized protein YdaT	1
COG0192	S-adenosylmethionine synthetase	2	0	1	1	1	1	1	1			COG4920	Uncharacterized membrane protein	1
COG0196	FAD synthase	2	0	1	1	1	1	1	1			COG4927	Predicted choloylglycine hydrolase	1
COG0204	1-acyl-sn-glycerol-3-phosphate acyltransferase	2	0	1	1	1	1	1	1			COG5395	Uncharacterized membrane protein	1
COG0210	Superfamily I DNA or RNA helicase	2	4	1	1	1	1	1	1			COG5414	TATA-binding protein-associated factor Taf7, part of the TFIID transcription initiation complex	1
COG0218	GTP-binding protein EngB required for normal cell division	2	2	1	1	1	1	1	1			COG5441	Uncharacterized protein, UPF0261 family	1
COG0222	Ribosomal protein L7/L12	2	0	1	1	1	1	1	1			COG5472	Predicted small integral membrane protein	1
COG0224	FoF1-type ATP synthase, gamma subunit	2	0	1	1	1	1	1	1			COG5483	Uncharacterized conserved protein, DUF488 family	1
COG0229	Peptide methionine sulfoxide reductase MsrB	2	0	1	0	1	1	1	1			COG5487	Uncharacterized membrane protein YtjA, UPF0391 family	1
COG0231	Translation elongation factor P (EF-P)/translation initiation factor 5A (eIF-5A)	2	0	1	1	1	1	1	1			COG5519	Uncharcterized protein, DUF927 family	1
COG0250	Transcription antitermination factor NusG	2	0	1	1	1	1	1	1			COG5527	Protein involved in initiation of plasmid replication	1
COG0258	5'-3' exonuclease	2	2	1	1	1	1	1	1			COG5528	Uncharacterized membrane protein	1
COG0313	16S rRNA C1402 (ribose-2'-O) methylase RsmI	2	0	1	1	1	1	1	1			COG5583	Uncharacterized protein	1
COG0317	(p)ppGpp synthase/hydrolase, HD superfamily	2	0	1	1	1	1	1	1			COG5592	Hemerythrin superfamily protein	1
COG0322	Excinuclease UvrABC, nuclease subunit	2	2	1	1	1	1	1	1			COG5652	VanZ like family protein (function unknown)	1
COG0324	tRNA A37 N6-isopentenylltransferase MiaA	2	2	1	1	1	1	1	1
COG0363	6-phosphogluconolactonase/Glucosamine-6-phosphate isomerase/deaminase	2	2	1	1	1	1	1	1
COG0366	Glycosidase	2	3	1	0	0	0	0	0
COG0375	Zn finger protein HypA/HybF (possibly regulating hydrogenase expression)	2	2	0	0	0	0	0	0
COG0378	Ni2+-binding GTPase involved in regulation of expression and maturation of urease and hydrogenase	2	0	1	1	1	1	1	1
COG0379	Quinolinate synthase	2	0	1	1	1	1	1	1
COG0395	ABC-type glycerol-3-phosphate transport system, permease component	2	0	1	1	0	0	0	0
COG0415	Deoxyribodipyrimidine photolyase	2	0	1	1	1	1	1	1
COG0463	Glycosyltransferase involved in cell wall bisynthesis	2	0	1	0	0	0	0	0
COG0464	AAA+-type ATPase, SpoVK/Ycf46/Vps4 family	2	2	0	0	0	0	0	0
COG0501	Zn-dependent protease with chaperone function	2	0	0	0	0	0	0	0
COG0505	Carbamoylphosphate synthase small subunit	2	0	1	1	1	1	1	1
COG0511	Biotin carboxyl carrier protein	2	4	1	1	1	1	1	1
COG0515	Serine/threonine protein kinase	2	2	1	1	1	1	1	1
COG0535	Radical SAM superfamily enzyme, MoaA/NifB/PqqE/SkfB family	2	0	0	0	0	0	0	0
COG0539	Ribosomal protein S1	2	0	0	0	0	1	1	1
COG0540	Aspartate carbamoyltransferase, catalytic chain	2	0	1	1	1	1	1	1
COG0546	Phosphoglycolate phosphatase, HAD superfamily	2	2	1	1	1	1	1	1
COG0556	Excinuclease UvrABC helicase subunit UvrB	2	3	1	1	1	1	1	1
COG0567	2-oxoglutarate dehydrogenase complex, dehydrogenase (E1) component, and related enzymes	2	0	1	1	1	1	1	1
COG0575	CDP-diglyceride synthetase	2	0	1	1	1	1	1	1
COG0582	Integrase	2	6	0	0	0	0	0	0
COG0598	Mg2+ and Co2+ transporter CorA	2	0	0	0	0	1	0	0
COG0616	Periplasmic serine protease, ClpP class	2	0	1	1	1	1	1	1
COG0618	nanoRNase/pAp phosphatase, hydrolyzes c-di-AMP and oligoRNAs	2	2	1	1	1	1	1	1
COG0646	Methionine synthase I (cobalamin-dependent), methyltransferase domain	2	2	1	1	1	1	1	1
COG0668	Small-conductance mechanosensitive channel	2	0	1	1	1	1	1	1
COG0671	Membrane-associated phospholipid phosphatase	2	0	1	1	1	0	1	1
COG0681	Signal peptidase I	2	2	1	1	1	1	1	1
COG0711	FoF1-type ATP synthase, membrane subunit b or b'	2	2	1	1	1	1	1	1
COG0739	Murein DD-endopeptidase MepM and murein hydrolase activator NlpD, contain LysM domain	2	0	1	1	1	1	0	1
COG0750	Membrane-associated protease RseP, regulator of RpoE activity	2	3	1	1	1	1	1	1
COG0764	3-hydroxymyristoyl/3-hydroxydecanoyl-(acyl carrier protein) dehydratase	2	0	1	1	1	1	1	1
COG0809	S-adenosylmethionine:tRNA-ribosyltransferase-isomerase (queuine synthetase)	2	2	1	1	1	1	1	1
COG0830	Urease accessory protein UreF	2	0	1	1	1	1	1	1
COG0831	Urease gamma subunit	2	0	1	1	1	1	1	1
COG0832	Urease beta subunit	2	0	1	1	1	1	1	1
COG0850	Septum formation inhibitor MinC	2	2	1	1	1	1	1	1
COG0861	Membrane protein TerC, possibly involved in tellurium resistance	2	0	1	1	1	1	1	1
COG0864	Metal-responsive transcriptional regulator, contains CopG/Arc/MetJ DNA-binding domain	2	2	1	1	0	0	0	0
COG1018	Ferredoxin-NADP reductase	2	0	1	1	1	0	0	1
COG1038	Pyruvate carboxylase	2	3	1	1	1	1	1	1
COG1057	Nicotinic acid mononucleotide adenylyltransferase	2	2	1	1	1	1	1	1
COG1112	Superfamily I DNA and/or RNA helicase	2	3	0	0	0	0	0	0
COG1113	L-asparagine transporter and related permeases	2	0	1	1	0	0	0	0
COG1118	ABC-type sulfate/molybdate transport systems, ATPase component	2	2	0	0	0	0	0	0
COG1124	ABC-type dipeptide/oligopeptide/nickel transport system, ATPase component	2	0	1	1	1	1	0	1
COG1165	2-succinyl-5-enolpyruvyl-6-hydroxy-3-cyclohexene-1-carboxylate synthase	2	2	1	1	1	1	1	1
COG1175	ABC-type sugar transport system, permease component	2	0	1	1	0	0	0	0
COG1232	Protoporphyrinogen oxidase	2	0	1	1	1	1	1	1
COG1253	Hemolysin or related protein, contains CBS domains	2	0	1	1	1	1	1	1
COG1256	Flagellar hook-associated protein FlgK	2	2	1	1	0	0	1	0
COG1270	Cobalamin biosynthesis protein CobD/CbiB	2	0	1	1	1	1	1	1
COG1305	Transglutaminase-like enzyme, putative cysteine protease	2	2	1	1	0	0	1	0
COG1314	Preprotein translocase subunit SecG	2	0	1	1	1	1	1	1
COG1317	Flagellar biosynthesis/type III secretory pathway protein FliH	2	0	1	1	1	1	1	1
COG1360	Flagellar motor protein MotB	2	0	1	1	1	1	1	1
COG1368	Phosphoglycerol transferase MdoB or a related enzyme of AlkP superfamily	2	5	1	1	1	1	1	1
COG1380	Putative effector of murein hydrolase LrgA, UPF0299 family	2	2	1	1	1	1	1	1
COG1410	Methionine synthase I, cobalamin-binding domain	2	0	1	1	1	1	1	1
COG1480	Membrane-associated HD superfamily phosphohydrolase	2	0	1	1	1	1	1	1
COG1508	DNA-directed RNA polymerase specialized sigma subunit, sigma54 homolog	2	0	1	1	1	1	1	1
COG1533	DNA repair photolyase	2	1	0	0	0	0	0	0
COG1539	Dihydroneopterin aldolase	2	0	1	1	1	1	1	1
COG1573	Uracil-DNA glycosylase	2	0	1	1	1	1	1	1
COG1579	Predicted nucleic acid-binding protein, contains Zn-ribbon domain	2	0	0	0	0	0	0	0
COG1580	Flagellar basal body-associated protein FliL	2	2	1	1	1	1	1	1
COG1594	DNA-directed RNA polymerase, subunit M/Transcription elongation factor TFIIS	2	2	0	0	0	0	0	0
COG1612	Heme A synthase	2	0	1	1	1	1	1	1
COG1624	Diadenylate cyclase (c-di-AMP synthetase), DisA_N domain	2	0	1	1	1	1	1	1
COG1654	Biotin operon repressor	2	1	0	0	0	0	0	0
COG1668	ABC-type Na+ efflux pump, permease component	2	0	1	1	1	1	1	1
COG1695	DNA-binding transcriptional regulator, PadR family	2	4	1	1	1	0	1	1
COG1698	Uncharacterized protein, UPF0147 family	2	0	0	0	0	0	0	0
COG1703	Putative periplasmic protein kinase ArgK or related GTPase of G3E family	2	2	1	1	1	1	1	1
COG1737	DNA-binding transcriptional regulator, MurR/RpiR family, contains HTH and SIS domains	2	2	1	1	0	0	0	0
COG1749	Flagellar hook protein FlgE	2	2	0	0	0	0	0	0
COG1753	Predicted antitoxin, CopG family	2	0	0	0	0	0	0	0
COG1766	Flagellar biosynthesis/type III secretory pathway M-ring protein FliF/YscJ	2	2	1	1	1	1	1	1
COG1838	Tartrate dehydratase beta subunit/Fumarate hydratase class I, C-terminal domain	2	2	1	0	0	0	0	0
COG1843	Flagellar hook assembly protein FlgD	2	2	0	0	0	1	0	0
COG1862	Preprotein translocase subunit YajC	2	3	1	1	1	1	1	1
COG1893	Ketopantoate reductase	2	0	1	1	1	1	1	1
COG1910	Periplasmic molybdate-binding protein/domain	2	0	1	1	1	1	1	1
COG2009	Succinate dehydrogenase/fumarate reductase, cytochrome b subunit	2	2	1	1	1	1	1	1
COG2010	Cytochrome c, mono- and diheme variants	2	3	1	1	1	0	1	1
COG2055	Malate/lactate/ureidoglycolate dehydrogenase, LDH2 family	2	0	0	0	1	0	0	1
COG2059	Chromate transport protein ChrA	2	5	1	1	1	1	1	1
COG2137	SOS response regulatory protein OraA/RecX, interacts with RecA	2	2	1	1	1	1	1	1
COG2181	Nitrate reductase gamma subunit	2	2	1	1	1	1	1	1
COG2185	Methylmalonyl-CoA mutase, C-terminal domain/subunit (cobalamin-binding)	2	2	0	0	0	0	0	0
COG2224	Isocitrate lyase	2	2	1	1	1	1	1	1
COG2225	Malate synthase	2	0	1	1	1	1	1	1
COG2246	Putative flippase GtrA (transmembrane translocase of bactoprenol-linked glucose)	2	0	0	0	0	0	0	0
COG2256	Replication-associated recombination protein RarA (DNA-dependent ATPase)	2	2	1	1	1	1	1	1
COG2348	Lipid II:glycine glycyltransferase (Peptidoglycan interpeptide bridge formation enzyme)	2	2	1	1	1	1	1	1
COG2371	Urease accessory protein UreE	2	0	1	1	1	1	1	1
COG2456	Uncharacterized protein	2	0	0	0	0	0	0	0
COG2718	Uncharacterized conserved protein YeaH/YhbH, required for sporulation, DUF444 family	2	2	1	1	1	1	1	1
COG2759	Formyltetrahydrofolate synthetase	2	0	1	1	1	1	1	1
COG2771	DNA-binding transcriptional regulator, CsgD family	2	2	0	0	0	0	0	0
COG2804	Type II secretory pathway ATPase GspE/PulE or T4P pilus assembly pathway ATPase PilB	2	3	1	1	1	1	1	1
COG2812	DNA polymerase III, gamma/tau subunits	2	0	1	1	1	1	1	1
COG2890	Methylase of polypeptide chain release factors	2	0	1	1	1	1	1	1
COG3162	Uncharacterized membrane protein, DUF485 family	2	0	1	1	1	1	1	1
COG3177	Fic family protein	2	0	1	1	0	0	1	0
COG3342	Uncharacterized conserved protein, Ntn-hydrolase superfamily	2	0	1	0	0	0	0	0
COG3355	Predicted transcriptional regulator	2	0	0	0	0	0	0	0
COG3366	Uncharacterized protein	2	2	0	0	0	0	0	0
COG3383	Predicted molibdopterin-dependent oxidoreductase YjgC	2	0	1	1	1	1	1	1
COG3395	Uncharacterized conserved protein YgbK, DUF1537 family	2	0	1	1	1	0	1	1
COG3402	Uncharacterized membrane protein YdbS, contains bPH2 (bacterial pleckstrin homology) domain	2	0	1	1	1	1	1	1
COG3428	Uncharacterized membrane protein YdbT, contains bPH2 (bacterial pleckstrin homology) domain	2	0	1	1	1	1	1	1
COG3476	Tryptophan-rich sensory protein (mitochondrial benzodiazepine receptor homolog)	2	0	1	1	1	1	0	1
COG3596	Predicted GTPase	2	0	0	0	0	0	0	0
COG3599	Cell division septum initiation DivIVA, interacts with FtsZ, MinD and other proteins	2	2	1	1	1	1	1	1
COG3682	Predicted transcriptional regulator	2	0	1	1	0	0	0	0
COG3706	Two-component response regulator, PleD family, consists of two REC domains and a diguanylate cyclase (GGDEF) domain	2	3	1	1	1	1	1	1
COG3711	Transcriptional antiterminator	2	1	0	0	0	0	0	0
COG3773	Cell wall hydrolase CwlJ, involved in spore germination	2	2	0	1	0	0	0	0
COG3887	c-di-AMP phosphodiesterase, consists of a GGDEF-like and DHH domains	2	0	1	1	1	1	1	1
COG3945	Hemerythrin-like domain	2	2	0	0	0	0	0	0
COG4003	Uncharacterized protein	2	0	0	0	0	0	0	0
COG4146	Uncharacterized membrane permease YidK, sodium:solute symporter family	2	0	0	0	0	0	0	0
COG4152	ABC-type uncharacterized transport system, ATPase component	2	0	1	1	1	1	1	1
COG4185	Predicted ABC-type ATPase	2	0	0	0	0	0	0	0
COG4219	Signal transducer regulating beta-lactamase production, contains metallopeptidase domain	2	0	0	0	0	0	0	0
COG4377	Uncharacterized membrane protein YhfC	2	0	0	0	0	0	1	0
COG4408	Uncharacterized protein	2	0	0	0	0	0	0	0
COG4577	Carboxysome shell and ethanolamine utilization microcompartment protein CcmL/EutN	2	2	1	1	0	1	1	0
COG4605	ABC-type enterochelin transport system, permease component	2	0	1	1	1	1	1	1
COG4632	Exopolysaccharide biosynthesis protein related to N-acetylglucosamine-1-phosphodiester alpha-N-acety...	2	2	0	1	0	0	0	0
COG4720	Uncharacterized membrane protein	2	2	1	1	1	1	1	1
COG4753	Two-component response regulator, YesN/AraC family, consists of REC and AraC-type DNA-binding domains	2	0	1	0	0	0	0	0
COG4816	Ethanolamine utilization protein EutL, ethanolamine utilization microcompartment shell protein	2	0	1	1	1	1	1	1
COG4853	Two-component signal transduction system YycFG, regulatory protein YycI	2	0	1	1	1	1	1	1
COG4856	Uncharacterized protein, YbbR domain	2	0	1	1	1	1	1	1
COG4864	Uncharacterized protein YqfA, UPF0365 family	2	0	1	1	1	1	1	1
COG4872	Uncharacterized membrane protein	2	2	0	0	1	1	1	1
COG4873	Uncharacterized protein YkvS	2	2	1	1	1	1	1	1
COG4880	Secreted protein containing C-terminal beta-propeller domain distantly related to WD-40 repeats	2	2	1	0	0	1	0	0
COG4896	Uncharacterized protein YlaI	2	0	1	1	1	1	1	1
COG4939	Major membrane immunogen, membrane-anchored lipoprotein	2	0	0	0	0	0	0	0
COG4972	Tfp pilus assembly protein, ATPase PilM	2	2	1	1	1	1	1	1
COG5013	Nitrate reductase alpha subunit	2	0	1	1	1	1	1	1
COG5353	Uncharacterized protein YpmB	2	0	1	1	1	1	1	1
COG5438	Uncharacterized membrane protein	2	0	1	1	1	1	1	1
COG5564	Predicted TIM-barrel enzyme	2	0	0	0	0	0	0	0
COG5567	Predicted small periplasmic lipoprotein YifL (function unknown0	2	0	0	0	0	0	0	0
COG5582	Uncharacterized protein YpiB, UPF0302 family	2	2	1	1	1	1	1	1
COG5605	Cytochrome c oxidase subunit IV	2	0	0	0	0	0	0	0
COG0117	Pyrimidine deaminase domain of riboflavin biosynthesis protein RibD	1	1	0	0	0	0	0	0
COG0140	Phosphoribosyl-ATP pyrophosphohydrolase	1	1	0	0	0	0	0	0
COG0163	3-polyprenyl-4-hydroxybenzoate decarboxylase	1	1	0	0	0	0	0	0
COG0341	Preprotein translocase subunit SecF	1	2	0	0	0	0	0	0
COG0348	Polyferredoxin	1	0	0	0	0	0	0	0
COG0382	4-hydroxybenzoate polyprenyltransferase	1	1	0	0	0	0	0	0
COG0432	Thiamin phosphate synthase YjbQ, UPF0047 family	1	0	0	0	0	0	0	0
COG0449	Glucosamine 6-phosphate synthetase, contains amidotransferase and phosphosugar isomerase domains	1	1	0	0	0	0	0	0
COG0474	Magnesium-transporting ATPase (P-type)	1	3	0	0	0	0	0	0
COG0475	Kef-type K+ transport system, membrane component KefB	1	2	0	0	0	0	0	0
COG0518	GMP synthase - Glutamine amidotransferase domain	1	1	0	0	0	0	0	0
COG0555	ABC-type sulfate transport system, permease component	1	1	0	0	0	0	0	0
COG0633	Ferredoxin	1	0	0	0	0	0	0	0
COG0654	2-polyprenyl-6-methoxyphenol hydroxylase and related FAD-dependent oxidoreductases	1	0	0	0	0	0	0	0
COG0685	5,10-methylenetetrahydrofolate reductase	1	1	0	0	0	0	0	0
COG0720	6-pyruvoyl-tetrahydropterin synthase	1	0	0	0	0	0	0	0
COG0741	Soluble lytic murein transglycosylase and related regulatory proteins (some contain LysM/invasin domains)	1	1	0	0	0	0	0	0
COG0748	Putative heme iron utilization protein	1	1	0	0	0	0	0	0
COG0807	GTP cyclohydrolase II	1	1	0	0	0	0	0	0
COG0828	Ribosomal protein S21	1	1	0	0	0	0	0	0
COG1022	Long-chain acyl-CoA synthetase (AMP-forming)	1	0	0	0	0	0	0	0
COG1070	Sugar (pentulose or hexulose) kinase	1	5	0	0	0	0	0	0
COG1100	GTPase SAR1 family domain	1	0	0	0	0	0	0	0
COG1134	ABC-type polysaccharide/polyol phosphate transport system, ATPase component	1	0	0	0	0	0	0	0
COG1223	Predicted ATPase, AAA+ superfamily	1	0	0	0	0	0	0	0
COG1251	NAD(P)H-nitrite reductase, large subunit	1	0	0	0	0	0	0	0
COG1263	Phosphotransferase system IIC components, glucose/maltose/N-acetylglucosamine-specific	1	0	0	0	0	0	0	0
COG1273	Non-homologous end joining protein Ku, dsDNA break repair	1	0	0	0	0	0	0	0
COG1275	Tellurite resistance protein TehA and related permeases	1	0	0	0	0	0	0	0
COG1289	Uncharacterized membrane protein YccC	1	1	0	0	0	0	0	0
COG1300	Uncharacterized membrane protein SpoIIM, required for sporulation	1	0	0	0	0	0	0	0
COG1328	Anaerobic ribonucleoside-triphosphate reductase	1	0	0	0	0	0	0	0
COG1450	Type II secretory pathway component GspD/PulD (secretin)	1	0	0	0	0	0	0	0
COG1501	Alpha-glucosidase, glycosyl hydrolase family GH31	1	0	0	0	0	0	0	0
COG1546	Nicotinamide mononucleotide (NMN) deamidase PncC	1	1	0	0	0	0	0	0
COG1613	ABC-type sulfate transport system, periplasmic component	1	1	0	0	0	0	0	0
COG1625	Fe-S oxidoreductase, related to NifB/MoaA family	1	0	0	0	0	0	0	0
COG1696	D-alanyl-lipoteichoic acid acyltransferase DltB, MBOAT superfamily	1	0	0	0	0	0	0	0
COG1719	Predicted hydrocarbon binding protein, contains 4VR domain	1	1	0	0	0	0	0	0
COG1724	Predicted RNA binding protein YcfA, dsRBD-like fold, HicA-like mRNA interferase family	1	0	0	0	0	0	0	0
COG1730	Prefoldin subunit 5	1	2	0	0	0	0	0	0
COG1762	Phosphotransferase system mannitol/fructose-specific IIA domain (Ntr-type)	1	0	0	0	0	0	0	0
COG1865	Adenosylcobinamide amidohydrolase	1	1	0	0	0	0	0	0
COG1886	Flagellar motor switch/type III secretory pathway protein FliN	1	1	0	0	0	0	0	0
COG1983	Phage shock protein PspC (stress-responsive transcriptional regulator)	1	2	0	0	0	0	0	0
COG1997	Ribosomal protein L37AE/L43A	1	0	0	0	0	0	0	0
COG2017	Galactose mutarotase or related enzyme	1	0	0	0	0	0	0	0
COG2115	Xylose isomerase	1	0	0	0	0	0	0	0
COG2205	K+-sensing histidine kinase KdpD	1	1	0	0	0	0	0	0
COG2216	High-affinity K+ transport system, ATPase chain B	1	0	0	0	0	0	0	0
COG2241	Precorrin-6B methylase 1	1	0	0	0	0	0	0	0
COG2247	Putative cell wall-binding domain	1	1	0	0	0	0	0	0
COG2274	ABC-type bacteriocin/lantibiotic exporters, contain an N-terminal double-glycine peptidase domain	1	0	0	0	0	0	0	0
COG2301	Citrate lyase beta subunit	1	0	0	0	0	0	0	0
COG2314	Uncharacterized membrane protein YozV, TM2 domain	1	1	0	0	0	0	0	0
COG2336	Antitoxin component of the MazEF toxin-antitoxin module	1	1	0	0	0	0	0	0
COG2370	Hydrogenase/urease accessory protein HupE	1	0	0	0	0	0	0	0
COG2385	Peptidoglycan hydrolase (amidase) enhancer domain	1	1	0	0	0	0	0	0
COG2407	L-fucose isomerase or related protein	1	1	0	0	0	0	0	0
COG2411	Uncharacterized protein	1	1	0	0	0	0	0	0
COG2426	Uncharacterized membrane protein	1	2	0	0	0	0	0	0
COG2524	Predicted transcriptional regulator, contains C-terminal CBS domains	1	0	0	0	0	0	0	0
COG2770	HAMP domain	1	0	0	0	0	0	0	0
COG2813	16S rRNA G1207 methylase RsmC	1	1	0	0	0	0	0	0
COG2815	PASTA domain, binds beta-lactams	1	0	0	0	0	0	0	0
COG2846	Iron-sulfur cluster repair protein YtfE, RIC family, contains ScdAN and hemerythrin domains	1	0	0	0	0	0	0	0
COG2888	Predicted RNA-binding protein involved in translation, contains Zn-ribbon domain, DUF1610 family	1	1	0	0	0	0	0	0
COG2900	Uncharacterized coiled-coil protein SlyX (sensitive to lysis X)	1	0	0	0	0	0	0	0
COG2940	SET domain-containing protein (function unknown)	1	2	0	0	0	0	0	0
COG2942	Mannose or cellobiose epimerase, N-acyl-D-glucosamine 2-epimerase family	1	0	0	0	0	0	0	0
COG3000	Sterol desaturase/sphingolipid hydroxylase, fatty acid hydroxylase superfamily	1	0	0	0	0	0	0	0
COG3002	Uncharacterized conserved protein YbcC, UPF0753/DUF2309 family	1	0	0	0	0	0	0	0
COG3056	Uncharacterized lipoprotein YajG	1	0	0	0	0	0	0	0
COG3103	Uncharacterized conserved protein YgiM, contains N-terminal SH3 domain, DUF1202 family	1	1	0	0	0	0	0	0
COG3115	Cell division protein ZipA, interacts with FtsZ	1	0	0	0	0	0	0	0
COG3123	Uncharacterized conserved protein YaiE, UPF0345 family	1	0	0	0	0	0	0	0
COG3167	Tfp pilus assembly protein PilO	1	1	0	0	0	0	0	0
COG3180	Uncharacterized membrane protein AbrB, regulator of aidB expression	1	1	0	0	0	0	0	0
COG3185	4-hydroxyphenylpyruvate dioxygenase and related hemolysins	1	1	0	0	0	0	0	0
COG3202	ATP/ADP translocase	1	0	0	0	0	0	0	0
COG3205	Uncharacterized membrane protein	1	0	0	0	0	0	0	0
COG3247	Uncharacterized membrane protein HdeD, DUF308 family	1	0	0	0	0	0	0	0
COG3256	Nitric oxide reductase large subunit	1	1	0	0	0	0	0	0
COG3264	Small-conductance mechanosensitive channel	1	0	0	0	0	0	0	0
COG3278	Cbb3-type cytochrome oxidase, subunit 1	1	0	0	0	0	0	0	0
COG3285	Eukaryotic-type DNA primase	1	0	0	0	0	0	0	0
COG3300	MHYT domain, NO-binding membrane sensor	1	1	0	0	0	0	0	0
COG3311	Predicted DNA-binding transcriptional regulator AlpA	1	0	0	0	0	0	0	0
COG3353	Archaellum component FlaF, FlaF/FlaG flagellin family	1	0	0	0	0	0	0	0
COG3367	Uncharacterized conserved protein, NAD-dependent epimerase/dehydratase family	1	0	0	0	0	0	0	0
COG3393	Predicted acetyltransferase, GNAT family	1	0	0	0	0	0	0	0
COG3411	(2Fe-2S) ferredoxin	1	0	0	0	0	0	0	0
COG3414	Phosphotransferase system, galactitol-specific IIB component	1	0	0	0	0	0	0	0
COG3415	Transposase	1	0	0	0	0	0	0	0
COG3417	Outer membrane lipoprotein LpoB, binds and activates PBP1b	1	0	0	0	0	0	0	0
COG3418	Flagellar biosynthesis/type III secretory pathway chaperone	1	1	0	0	0	0	0	0
COG3462	Uncharacterized membrane protein	1	1	0	0	0	0	0	0
COG3473	Maleate cis-trans isomerase	1	0	0	0	0	0	0	0
COG3493	Na+/citrate or Na+/malate symporter	1	0	0	0	0	0	0	0
COG3521	Predicted component of the type VI protein secretion system	1	0	0	0	0	0	0	0
COG3542	Predicted sugar epimerase, cupin superfamily	1	1	0	0	0	0	0	0
COG3560	Fatty acid repression mutant protein (predicted oxidoreductase)	1	1	0	0	0	0	0	0
COG3593	Predicted ATP-dependent endonuclease of the OLD family, contains P-loop ATPase and TOPRIM domains	1	0	0	0	0	0	0	0
COG3597	Uncharacterized conserved protein, DUF697 family	1	1	0	0	0	0	0	0
COG3602	Uncharacterized protein	1	0	0	0	0	0	0	0
COG3605	Signal transduction protein containing GAF and PtsI domains	1	1	0	0	0	0	0	0
COG3607	Predicted lactoylglutathione lyase	1	1	0	0	0	0	0	0
COG3619	Uncharacterized membrane protein YoaK, UPF0700 family	1	0	0	0	0	0	0	0
COG3620	Predicted transcriptional regulator with C-terminal CBS domains	1	3	0	0	0	0	0	0
COG3653	N-acyl-D-aspartate/D-glutamate deacylase	1	1	0	0	0	0	0	0
COG3654	Prophage maintenance system killer protein	1	1	0	0	0	0	0	0
COG3693	Endo-1,4-beta-xylanase, GH35 family	1	0	0	0	0	0	0	0
COG3751	Proline 4-hydroxylase (includes Rps23 Pro-64 3,4-dihydroxylase Tpa1), contains SM-20 domain	1	1	0	0	0	0	0	0
COG3758	Various environmental stresses-induced protein Ves (function unknown)	1	1	0	0	0	0	0	0
COG3775	Phosphotransferase system, galactitol-specific IIC component	1	0	0	0	0	0	0	0
COG3776	Uncharacterized conserved protein YhhL, DUF1145 family	1	0	0	0	0	0	0	0
COG3823	Glutamine cyclotransferase	1	0	0	0	0	0	0	0
COG3830	ACT domain, binds amino acids and other small ligands	1	1	0	0	0	0	0	0
COG3836	2-keto-3-deoxy-L-rhamnonate aldolase RhmA	1	0	0	0	0	0	0	0
COG3848	Phosphohistidine swiveling domain of PEP-utilizing enzymes	1	1	0	0	0	0	0	0
COG3874	Uncharacterized spore protein YtfJ	1	1	0	0	0	0	0	0
COG3886	HKD family nuclease	1	0	0	0	0	0	0	0
COG3970	Fumarylacetoacetate (FAA) hydrolase family protein	1	0	0	0	0	0	0	0
COG4042	Energy-converting hydrogenase Eha subunit A	1	0	0	0	0	0	0	0
COG4096	Type I site-specific restriction endonuclease, part of a restriction-modification system	1	0	0	0	0	0	0	0
COG4128	Zona occludens toxin, predicted ATPase	1	0	0	0	0	0	0	0
COG4199	ssDNA-specific exonuclease RecJ	1	1	0	0	0	0	0	0
COG4208	ABC-type sulfate transport system, permease component	1	1	0	0	0	0	0	0
COG4213	ABC-type xylose transport system, periplasmic component	1	0	0	0	0	0	0	0
COG4214	ABC-type xylose transport system, permease component	1	0	0	0	0	0	0	0
COG4245	Uncharacterized conserved protein YegL, contains vWA domain of TerY type	1	0	0	0	0	0	0	0
COG4255	Uncharacterized protein	1	0	0	0	0	0	0	0
COG4267	Uncharacterized membrane protein	1	0	0	0	0	0	0	0
COG4276	Ligand-binding SRPBCC domain	1	0	0	0	0	0	0	0
COG4317	Xanthosine utilization system component, XapX domain	1	0	0	0	0	0	0	0
COG4333	Uncharacterized protein	1	0	0	0	0	0	0	0
COG4391	Uncharacterized conserved protein, contains Zn-finger domain	1	0	0	0	0	0	0	0
COG4395	Predicted lipid-binding transport protein, Tim44 family	1	1	0	0	0	0	0	0
COG4449	Predicted protease, Abi (CAAX) family	1	1	0	0	0	0	0	0
COG4539	Uncharacterized membrane protein YGL010W	1	0	0	0	0	0	0	0
COG4547	Cobalamin biosynthesis protein CobT (nicotinate-mononucleotide:5, 6-dimethylbenzimidazole phosphorib...	1	0	0	0	0	0	0	0
COG4674	ABC-type uncharacterized transport system, ATPase component	1	0	0	0	0	0	0	0
COG4679	Phage-related protein	1	0	0	0	0	0	0	0
COG4692	Predicted neuraminidase (sialidase)	1	0	0	0	0	0	0	0
COG4700	Uncharacterized protein	1	1	0	0	0	0	0	0
COG4709	Uncharacterized membrane protein	1	0	0	0	0	0	0	0
COG4723	Phage-related protein, tail component	1	0	0	0	0	0	0	0
COG4726	Tfp pilus assembly protein PilX	1	1	0	0	0	0	0	0
COG4729	Uncharacterized protein	1	1	0	0	0	0	0	0
COG4770	Acetyl/propionyl-CoA carboxylase, alpha subunit	1	2	0	0	0	0	0	0
COG4803	Uncharacterized membrane protein	1	1	0	0	0	0	0	0
COG4821	Uncharacterized protein, contains SIS (Sugar ISomerase) phosphosugar binding domain	1	0	0	0	0	0	0	0
COG4826	Serine protease inhibitor	1	0	0	0	0	0	0	0
COG4876	Uncharacterized protein YdaT	1	1	0	0	0	0	0	0
COG4920	Uncharacterized membrane protein	1	0	0	0	0	0	0	0
COG4927	Predicted choloylglycine hydrolase	1	0	0	0	0	0	0	0
COG5395	Uncharacterized membrane protein	1	1	0	0	0	0	0	0
COG5414	TATA-binding protein-associated factor Taf7, part of the TFIID transcription initiation complex	1	0	0	0	0	0	0	0
COG5441	Uncharacterized protein, UPF0261 family	1	0	0	0	0	0	0	0
COG5472	Predicted small integral membrane protein	1	1	0	0	0	0	0	0
COG5483	Uncharacterized conserved protein, DUF488 family	1	1	0	0	0	0	0	0
COG5487	Uncharacterized membrane protein YtjA, UPF0391 family	1	0	0	0	0	0	0	0
COG5519	Uncharcterized protein, DUF927 family	1	1	0	0	0	0	0	0
COG5527	Protein involved in initiation of plasmid replication	1	0	0	0	0	0	0	0
COG5528	Uncharacterized membrane protein	1	1	0	0	0	0	0	0
COG5583	Uncharacterized protein	1	1	0	0	0	0	0	0
COG5592	Hemerythrin superfamily protein	1	0	0	0	0	0	0	0
COG5652	VanZ like family protein (function unknown)	1	1	0	0	0	0	0	0
COG0013	Alanyl-tRNA synthetase	0	2	1	1	1	1	1	1
COG0022	Pyruvate/2-oxoglutarate/acetoin dehydrogenase complex, dehydrogenase (E1) component	0	4	3	3	3	3	3	3
COG0040	ATP phosphoribosyltransferase	0	2	1	1	1	1	1	1
COG0051	Ribosomal protein S10	0	3	1	1	1	1	1	1
COG0053	Divalent metal cation (Fe/Co/Zn/Cd) transporter	0	3	2	2	1	1	1	1
COG0056	FoF1-type ATP synthase, alpha subunit	0	2	1	1	1	1	1	1
COG0061	NAD kinase	0	3	2	2	2	2	2	2
COG0069	Glutamate synthase domain 2	0	2	1	1	1	1	1	1
COG0070	Glutamate synthase domain 3	0	1	0	0	0	0	0	0
COG0083	Homoserine kinase	0	2	1	1	1	1	1	1
COG0124	Histidyl-tRNA synthetase	0	2	1	1	1	1	1	1
COG0142	Geranylgeranyl pyrophosphate synthase	0	3	2	2	2	2	2	2
COG0160	4-aminobutyrate aminotransferase or related aminotransferase	0	2	1	1	1	1	1	1
COG0169	Shikimate 5-dehydrogenase	0	2	1	1	1	1	1	1
COG0183	Acetyl-CoA acetyltransferase	0	9	7	7	7	7	6	7
COG0201	Preprotein translocase subunit SecY	0	2	1	1	1	1	1	1
COG0217	Transcriptional and/or translational regulatory protein YebC/TACO1	0	4	2	2	2	2	2	2
COG0249	DNA mismatch repair ATPase MutS	0	2	1	1	1	1	1	0
COG0251	Enamine deaminase RidA, house cleaning of reactive enamine intermediates, YjgF/YER057c/UK114 family	0	6	5	5	2	2	4	2
COG0277	FAD/FMN-containing dehydrogenase	0	2	1	1	1	1	1	1
COG0281	Malic enzyme	0	3	2	2	2	2	2	2
COG0304	3-oxoacyl-(acyl-carrier-protein) synthase	0	2	1	1	1	1	1	1
COG0316	Fe-S cluster assembly iron-binding protein IscA	0	2	1	1	1	1	1	1
COG0318	Acyl-CoA synthetase (AMP-forming)/AMP-acid ligase II	0	13	11	11	7	9	8	7
COG0369	Sulfite reductase, alpha subunit (flavoprotein)	0	3	1	1	1	1	1	1
COG0384	Predicted epimerase YddE/YHI9, PhzF superfamily	0	2	1	1	0	0	0	0
COG0419	DNA repair exonuclease SbcCD ATPase subunit	0	3	1	1	1	1	1	1
COG0469	Pyruvate kinase	0	2	1	1	1	1	1	1
COG0471	Di- and tricarboxylate transporter	0	6	3	2	4	4	3	4
COG0508	Pyruvate/2-oxoglutarate dehydrogenase complex, dihydrolipoamide acyltransferase (E2) component	0	5	4	4	4	4	4	4
COG0531	Amino acid transporter	0	3	2	1	2	1	2	2
COG0602	Organic radical activating enzyme	0	1	0	0	0	0	0	0
COG0628	Predicted PurR-regulated permease PerM	0	6	4	4	5	5	4	5
COG0643	Chemotaxis protein histidine kinase CheA	0	2	1	1	1	1	1	1
COG0666	Ankyrin repeat	0	2	0	0	0	0	0	0
COG0687	Spermidine/putrescine-binding periplasmic protein	0	2	1	1	1	1	1	1
COG0695	Glutaredoxin	0	3	1	2	1	1	1	1
COG0714	MoxR-like ATPase	0	5	3	3	3	3	2	3
COG0715	ABC-type nitrate/sulfonate/bicarbonate transport system, periplasmic component	0	6	2	2	4	4	4	4
COG0726	Peptidoglycan/xylan/chitin deacetylase, PgdA/CDA1 family	0	9	6	5	5	5	5	5
COG0732	Restriction endonuclease S subunit	0	2	1	1	0	0	0	0
COG0735	Fe2+ or Zn2+ uptake regulation protein	0	4	3	3	3	3	3	3
COG0747	ABC-type transport system, periplasmic component	0	10	7	7	2	2	3	2
COG0778	Nitroreductase	0	7	5	5	5	6	6	5
COG0815	Apolipoprotein N-acyltransferase	0	1	0	0	0	0	0	0
COG0823	Periplasmic component of the Tol biopolymer transport system	0	1	0	0	0	0	0	0
COG0826	Collagenase-like protease, PrtC family	0	2	0	0	0	0	0	0
COG1012	Acyl-CoA reductase or other NAD-dependent aldehyde dehydrogenase	0	18	17	15	13	15	11	12
COG1024	Enoyl-CoA hydratase/carnithine racemase	0	9	4	5	8	8	7	8
COG1028	NAD(P)-dependent dehydrogenase, short-chain alcohol dehydrogenase family	0	22	18	16	18	19	10	18
COG1034	NADH dehydrogenase/NADH:ubiquinone oxidoreductase 75 kD subunit (chain G)	0	1	0	0	0	0	0	0
COG1063	Threonine dehydrogenase or related Zn-dependent dehydrogenase	0	5	3	1	1	1	1	1
COG1064	D-arabinose 1-dehydrogenase, Zn-dependent alcohol dehydrogenase family	0	2	1	1	0	0	0	0
COG1069	Ribulose kinase	0	1	0	0	0	0	0	0
COG1080	Phosphoenolpyruvate-protein kinase (PTS system EI component in bacteria)	0	3	0	1	1	1	0	1
COG1090	NAD dependent epimerase/dehydratase family enzyme	0	2	1	1	1	1	1	1
COG1101	ABC-type uncharacterized transport system, ATPase component	0	2	1	1	1	1	1	1
COG1119	ABC-type molybdenum transport system, ATPase component/photorepair protein PhrA	0	2	1	1	1	1	1	1
COG1129	ABC-type sugar transport system, ATPase component	0	2	1	1	1	1	1	1
COG1131	ABC-type multidrug transport system, ATPase component	0	15	14	12	12	9	6	11
COG1160	Predicted GTPases	0	5	1	1	1	1	1	1
COG1167	DNA-binding transcriptional regulator, MocR family, contains an aminotransferase domain	0	3	1	1	1	1	2	1
COG1172	Ribose/xylose/arabinose/galactoside ABC-type transport system, permease component	0	2	1	1	1	1	1	1
COG1176	ABC-type spermidine/putrescine transport system, permease component I	0	2	1	1	1	1	1	1
COG1177	ABC-type spermidine/putrescine transport system, permease component II	0	2	1	1	1	1	1	1
COG1183	Phosphatidylserine synthase	0	2	1	1	1	1	1	1
COG1233	Phytoene dehydrogenase-related protein	0	2	0	0	0	0	0	0
COG1235	Phosphoribosyl 1,2-cyclic phosphodiesterase	0	3	2	1	1	1	2	1
COG1240	Mg-chelatase subunit ChlD	0	2	0	0	0	0	0	0
COG1249	Pyruvate/2-oxoglutarate dehydrogenase complex, dihydrolipoamide dehydrogenase (E3) component or related enzyme	0	6	5	4	3	3	5	3
COG1262	Formylglycine-generating enzyme, required for sulfatase activity, contains SUMF1/FGE domain	0	1	0	0	0	0	0	0
COG1272	Predicted membrane channel-forming protein YqfA, hemolysin III family	0	2	1	1	1	1	1	1
COG1279	Arginine exporter protein ArgO	0	1	0	0	0	0	0	0
COG1285	Uncharacterized membrane protein YhiD, involved in acid resistance	0	2	1	1	1	1	1	1
COG1287	Asparagine N-glycosylation enzyme, membrane subunit Stt3	0	1	0	0	0	0	0	0
COG1288	Uncharacterized membrane protein YfcC, ion transporter superfamily	0	7	0	0	3	1	1	3
COG1343	CRISPR/Cas system-associated endoribonuclease Cas2	0	1	0	0	0	0	0	0
COG1349	DNA-binding transcriptional regulator of sugar metabolism, DeoR/GlpR family	0	3	0	0	2	1	2	1
COG1388	LysM repeat	0	1	0	0	0	0	0	0
COG1451	Predicted metal-dependent hydrolase	0	1	0	0	0	0	0	0
COG1454	Alcohol dehydrogenase, class IV	0	5	4	4	2	2	3	2
COG1468	CRISPR/Cas system-associated exonuclease Cas4, RecB family	0	1	0	0	0	0	0	0
COG1502	Phosphatidylserine/phosphatidylglycerophosphate/cardiolipin synthase or related enzyme	0	4	2	2	3	3	3	2
COG1510	DNA-binding transcriptional regulator GbsR, MarR family	0	3	2	2	0	0	0	0
COG1518	CRISPR/Cas system-associated endonuclease Cas1	0	1	0	0	0	0	0	0
COG1522	DNA-binding transcriptional regulator, Lrp family	0	3	1	1	1	1	0	1
COG1540	Lactam utilization protein B (function unknown)	0	2	1	1	1	1	1	1
COG1551	sRNA-binding carbon storage regulator CsrA	0	3	1	1	1	1	1	1
COG1574	Predicted amidohydrolase YtcJ	0	5	2	2	1	2	1	1
COG1576	23S rRNA pseudoU1915 N3-methylase RlmH	0	2	1	1	1	1	1	1
COG1597	Diacylglycerol kinase family enzyme	0	5	1	1	2	3	3	2
COG1620	L-lactate permease	0	2	1	1	0	1	0	0
COG1633	Rubrerythrin	0	4	1	1	0	0	0	0
COG1645	Uncharacterized Zn-finger containing protein, UPF0148 family	0	2	0	0	0	0	0	0
COG1655	Uncharacterized protein, DUF2225 family	0	2	1	1	1	1	1	1
COG1680	CubicO group peptidase, beta-lactamase class C family	0	3	2	1	1	1	1	1
COG1708	Predicted nucleotidyltransferase	0	1	0	0	0	0	0	0
COG1709	Predicted transcriptional regulator	0	1	0	0	0	0	0	0
COG1735	Predicted metal-dependent hydrolase, phosphotriesterase family	0	1	0	0	0	0	0	0
COG1757	Na+/H+ antiporter NhaC	0	7	3	3	4	3	6	3
COG1879	ABC-type sugar transport system, periplasmic component, contains N-terminal xre family HTH domain	0	2	1	1	1	1	1	1
COG1902	2,4-dienoyl-CoA reductase or related NADH-dependent reductase, Old Yellow Enzyme (OYE) family	0	3	1	1	1	1	1	1
COG1912	S-adenosylmethionine hydrolase (SAM-hydroxide adenosyltransferase)	0	1	0	0	0	0	0	0
COG1947	4-diphosphocytidyl-2C-methyl-D-erythritol kinase	0	2	1	1	1	1	1	1
COG1957	Inosine-uridine nucleoside N-ribohydrolase	0	1	0	0	0	0	0	0
COG1960	Acyl-CoA dehydrogenase related to the alkylation response protein AidB	0	17	15	14	14	13	13	14
COG1966	Carbon starvation protein CstA	0	4	2	2	2	2	2	2
COG1968	Undecaprenyl pyrophosphate phosphatase UppP	0	2	1	1	1	1	1	1
COG1972	Nucleoside permease NupC	0	2	0	0	1	1	0	1
COG1975	Xanthine and CO dehydrogenase maturation factor, XdhC/CoxF family	0	3	0	0	0	1	1	0
COG1984	Allophanate hydrolase subunit 2	0	2	1	1	1	1	1	1
COG1991	Uncharacterized protein, UPF0333 family	0	1	0	0	0	0	0	0
COG1998	Ribosomal protein S27AE	0	2	0	0	0	0	0	0
COG2035	Uncharacterized membrane protein	0	2	1	1	1	1	1	1
COG2049	Allophanate hydrolase subunit 1	0	3	1	1	1	1	1	1
COG2070	NAD(P)H-dependent flavin oxidoreductase YrpB, nitropropane dioxygenase family	0	5	3	3	4	4	3	4
COG2071	Gamma-glutamyl-gamma-aminobutyrate hydrolase PuuD (putrescine degradation), contains GATase1-like domain	0	2	1	1	1	1	1	1
COG2074	2-phosphoglycerate kinase	0	2	0	0	0	0	0	0
COG2120	N-acetylglucosaminyl deacetylase, LmbE family	0	2	1	1	1	1	1	1
COG2173	D-alanyl-D-alanine dipeptidase	0	1	0	0	0	0	0	0
COG2193	Bacterioferritin (cytochrome b1)	0	1	0	0	0	0	0	0
COG2202	PAS domain	0	4	0	0	0	0	0	0
COG2206	HD-GYP domain, c-di-GMP phosphodiesterase class II (or its inactivated variant)	0	2	1	1	1	1	1	1
COG2210	Peroxiredoxin family protein	0	2	1	1	1	1	1	1
COG2358	TRAP-type uncharacterized transport system, periplasmic component	0	2	1	1	1	1	1	1
COG2378	Predicted DNA-binding transcriptional regulator YafY, contains an HTH and WYL domains	0	2	0	0	0	0	0	0
COG2433	Possible nuclease of RNase H fold, RuvC/YqgF family	0	1	0	0	0	0	0	0
COG2450	Predicted archaeal cell division protein, SepF homolog, DUF552 family	0	1	0	0	0	0	0	0
COG2851	Mg2+/citrate symporter	0	2	1	1	1	1	0	1
COG2867	Ribosome association toxin PasT (RatA) of the RatAB toxin-antitoxin module	0	1	0	0	0	0	0	0
COG2881	Uncharacterized protein	0	1	0	0	0	0	0	0
COG2897	3-mercaptopyruvate sulfurtransferase SseA, contains two rhodanese domains	0	2	1	1	1	1	1	1
COG2943	Membrane glycosyltransferase	0	1	0	0	0	0	0	0
COG2966	Uncharacterized membrane protein YjjP, DUF1212 family	0	1	0	0	0	0	0	0
COG3052	Citrate lyase, gamma subunit	0	1	0	0	0	0	0	0
COG3105	Uncharacterized membrane-anchored protein YhcB, DUF1043 family	0	1	0	0	0	0	0	0
COG3119	Arylsulfatase A or related enzyme	0	4	0	0	0	1	1	0
COG3158	K+ transporter	0	1	0	0	0	0	0	0
COG3195	2-oxo-4-hydroxy-4-carboxy--5-ureidoimidazoline (OHCU) decarboxylase	0	1	0	0	0	0	0	0
COG3231	Aminoglycoside phosphotransferase	0	1	0	0	0	0	0	0
COG3293	Transposase	0	1	0	0	0	0	0	0
COG3302	DMSO reductase anchor subunit	0	1	0	0	0	0	0	0
COG3336	Cytochrome c oxidase assembly factor CtaG	0	3	2	2	2	2	1	2
COG3347	Rhamnose utilisation protein RhaD, predicted bifunctional aldolase and dehydrogenase	0	1	0	0	0	0	0	0
COG3369	Uncharacterized protein, contains Zn-finger domain of CDGSH type	0	1	0	0	0	0	0	0
COG3375	Predicted acetyltransferase, GNAT superfamily	0	3	2	2	1	1	1	1
COG3409	Peptidoglycan-binding (PGRP) domain of peptidoglycan hydrolases	0	1	0	0	0	0	0	0
COG3410	Uncharacterized protein, DUF2075 family	0	2	0	0	1	0	0	1
COG3427	Carbon monoxide dehydrogenase subunit G	0	2	1	1	0	0	1	0
COG3435	Gentisate 1,2-dioxygenase	0	2	0	0	0	0	0	0
COG3440	Predicted restriction endonuclease	0	1	0	0	0	0	0	0
COG3464	Transposase	0	4	0	0	0	0	3	0
COG3552	Uncharacterized conserved protein, contains von Willebrand factor type A (vWA) domain	0	2	0	0	0	0	0	0
COG3555	Aspartyl/asparaginyl beta-hydroxylase, cupin superfamily	0	1	0	0	0	0	0	0
COG3561	Phage anti-repressor protein	0	1	0	0	0	0	0	0
COG3610	Uncharacterized membrane protein YjjB, DUF3815 family	0	1	0	0	0	0	0	0
COG3645	Phage antirepressor protein YoqD, KilAC domain	0	2	0	1	0	0	1	0
COG3649	CRISPR/Cas system type I-B associated protein Csh2, Cas7 group, RAMP superfamily	0	1	0	0	0	0	0	0
COG3666	Transposase	0	6	0	0	0	0	1	0
COG3708	Predicted transcriptional regulator YdeE, contains AraC-type DNA-binding domain	0	1	0	0	0	0	0	0
COG3763	Uncharacterized protein YneF, UPF0154 family	0	2	1	1	1	1	1	1
COG3783	Soluble cytochrome b562	0	1	0	0	0	0	0	0
COG3825	Uncharacterized conserved protein, contains von Willebrand factor type A (vWA) domain	0	1	0	0	0	0	0	0
COG3852	Signal transduction histidine kinase, nitrogen specific	0	1	0	0	0	0	0	0
COG3878	Uncharacterized protein YwqG	0	2	0	0	0	0	0	0
COG3879	Uncharacterized conserved protein YlxW, UPF0749 family	0	3	2	2	2	2	2	2
COG3941	Phage tail tape-measure protein, controls tail length	0	3	0	0	0	0	0	0
COG3943	Uncharacterized conserved protein	0	1	0	0	0	0	0	0
COG4027	3'-phosphoadenosine 5'-phosphosulfate sulfotransferase	0	1	0	0	0	0	0	0
COG4106	Trans-aconitate methyltransferase	0	1	0	0	0	0	0	0
COG4154	L-fucose mutarotase/ribose pyranase, RbsD/FucU family	0	1	0	0	0	0	0	0
COG4194	Uncharacterized membrane protein	0	1	0	0	0	0	0	0
COG4196	Uncharacterized conserved protein, DUF2126 family	0	1	0	0	0	0	0	0
COG4282	Cell wall assembly regulator SMI1	0	2	0	0	0	0	0	0
COG4298	Uncharacterized protein	0	1	0	0	0	0	0	0
COG4336	Uncharacterized protein YcsI, UPF0317 family	0	2	1	1	1	1	1	1
COG4372	Uncharacterized conserved protein, contains DUF3084 domain	0	1	0	0	0	0	0	0
COG4420	Uncharacterized membrane protein	0	1	0	0	0	0	0	0
COG4465	GTP-sensing pleiotropic transcriptional regulator CodY	0	2	1	1	1	1	1	1
COG4467	Regulator of replication initiation timing	0	2	1	1	1	1	1	1
COG4485	Uncharacterized membrane protein YfhO	0	1	0	0	0	0	0	0
COG4512	Accessory gene regulator protein AgrB	0	2	0	0	0	0	0	0
COG4537	Competence protein ComGC	0	2	1	1	1	1	1	1
COG4598	ABC-type histidine transport system, ATPase component	0	1	0	0	0	0	0	0
COG4666	TRAP-type uncharacterized transport system, fused permease components	0	2	1	1	1	1	1	1
COG4808	Uncharacterized lipoprotein YehR, DUF1307 family	0	2	0	0	0	0	0	0
COG4836	Uncharacterized membrane protein YwzB	0	2	1	1	1	1	1	1
COG4837	Disulfide oxidoreductase YuzD	0	2	1	1	1	1	1	1
COG4839	Cell division protein FtsL	0	3	1	1	1	1	1	1
COG4858	Uncharacterized membrane-anchored protein	0	2	0	0	0	0	0	0
COG4942	Septal ring factor EnvC, activator of murein hydrolases AmiA and AmiB	0	1	0	0	0	0	0	0
COG4967	Tfp pilus assembly protein PilV	0	1	0	0	0	0	0	0
COG4976	Predicted methyltransferase, contains TPR repeat	0	1	0	0	0	0	0	0
COG4990	Uncharacterized protein YvpB	0	1	0	0	0	0	0	0
COG4991	Uncharacterized conserved protein YraI	0	1	0	0	0	0	0	0
COG5184	Alpha-tubulin suppressor and related RCC1 domain-containing proteins	0	3	0	0	1	1	1	1
COG5337	Spore coat protein CotH	0	1	0	0	0	0	0	0
COG5373	Uncharacterized membrane protein	0	1	0	0	0	0	0	0
COG5378	Predicted nucleic acid-binding protein, contains PIN domain	0	1	0	0	0	0	0	0
COG5412	Phage-related protein	0	1	0	0	0	0	0	0
COG5492	Uncharacterized conserved protein YjdB, contains Ig-like domain	0	3	0	0	0	0	0	0
COG5509	Uncharacterized small protein, DUF1192 family	0	1	0	0	0	0	0	0
COG5521	Maltodextrin utilization protein YvdJ (function unknown)	0	1	0	0	0	0	0	0
COG5566	Transcriptional regulator, Middle operon regulator (Mor) family	0	1	0	0	0	0	0	0
COG5615	Uncharacterized membrane protein	0	1	0	0	0	0	0	0
