# Supplementary material for: Phenotypic Characterization and Draft Genome Sequence Analyses of Two Novel Endospore-Forming Sporosarcina spp. Isolated from Canada Goose (Branta canadensis) Feces
Source: Microorganisms. 2023 Dec 29;12(1):70. doi: 10.3390/microorganisms12010070 (PMC10818898; doi:10.3390/microorganisms12010070)
Supplement: Supplementary file 1 [file microorganisms-12-00070-s001.zip › Keshri et al. Table S3.xlsx]

## Sheet: S2_4
Enzyme ID	Enzyme Name	Sporosarcina sp. A4	Sporosarcina sp. A15	Sporosarcina newyorkensis 2681	Sporosarcina newyorkensis DSM 23543	Sporosarcina ureae DSM 2281	Sporosarcina ureae P17a	Sporosarcina ureae P37	Sporosarcina ureae S204
EC:3.1.-	Hydrolases. Acting on ester bonds.	14	14	11	12	13	12	12	12
EC:3.5.1.-	Hydrolases. Acting on carbon-nitrogen bonds, other than peptide bonds. In linear amides.	7	7	4	4	5	5	4	5
EC:1.1.1.95	Phosphoglycerate dehydrogenase.	5	0	2	2	3	1	1	3
EC:3.5.1.5	Urease.	5	0	3	3	3	3	3	3
EC:2.3.1.128	Ribosomal-protein-alanine N-acetyltransferase.	4	0	2	2	3	3	2	3
EC:2.6.1.9	Histidinol-phosphate transaminase.	4	0	3	3	2	2	2	2
EC:2.7.1.31	Glycerate 3-kinase.	4	0	1	1	1	1	1	1
EC:3.6.1.55	8-oxo-dGTP diphosphatase.	4	0	2	3	3	3	3	3
EC:4.1.2.13	Fructose-bisphosphate aldolase.	4	0	2	2	1	1	1	1
EC:4.2.1.33	3-isopropylmalate dehydratase.	4	0	2	2	2	2	2	2
EC:4.2.1.35	(R)-2-methylmalate dehydratase.	4	0	2	2	2	2	2	2
EC:4.3.3.7	4-hydroxy-tetrahydrodipicolinate synthase.	4	0	2	2	3	2	3	3
EC:1.8.4.12	Peptide-methionine (R)-S-oxide reductase.	3	0	2	2	2	2	1	2
EC:2.3.1.-	Transferases. Acyltransferases. Transferring groups other than amino-acyl groups.	3	4	2	2	2	2	2	2
EC:3.1.4.46	Glycerophosphodiester phosphodiesterase.	3	3	2	2	2	2	2	2
EC:6.3.4.21	Nicotinate phosphoribosyltransferase.	3	2	1	1	1	1	1	1
EC:1.1.1.125	2-deoxy-D-gluconate 3-dehydrogenase.	2	0	1	1	0	0	0	0
EC:1.1.1.169	2-dehydropantoate 2-reductase.	2	0	1	1	1	1	1	1
EC:1.1.1.26	Glyoxylate reductase.	2	0	1	1	0	1	1	0
EC:1.1.1.60	2-hydroxy-3-oxopropionate reductase.	2	0	1	1	0	0	0	0
EC:2.3.1.51	1-acylglycerol-3-phosphate O-acyltransferase.	2	0	1	1	1	1	1	1
EC:2.4.2.7	Adenine phosphoribosyltransferase.	2	2	1	1	1	1	1	1
EC:2.7.1.11	6-phosphofructokinase.	2	0	1	1	1	1	1	1
EC:2.7.1.45	2-dehydro-3-deoxygluconokinase.	2	0	1	1	1	0	0	1
EC:2.7.1.71	Shikimate kinase.	2	0	1	1	1	1	1	1
EC:2.7.13.-	Transferases. Transferring phosphorus-containing groups. Protein-histidine kinases.	2	2	1	0	0	0	0	0
EC:2.7.7.18	Nicotinate-nucleotide adenylyltransferase.	2	2	1	1	1	1	1	1
EC:3.5.99.6	Glucosamine-6-phosphate deaminase.	2	2	1	1	1	1	1	1
EC:4.1.2.14	2-dehydro-3-deoxy-phosphogluconate aldolase.	2	0	1	1	1	0	0	1
EC:4.1.3.42	(4S)-4-hydroxy-2-oxoglutarate aldolase.	2	0	1	1	1	0	0	1
EC:4.2.1.59	3-hydroxyacyl-[acyl-carrier-protein] dehydratase.	2	0	1	1	1	1	1	1
EC:5.1.3.1	Ribulose-phosphate 3-epimerase.	2	0	1	1	1	1	1	1
EC:5.3.1.1	Triose-phosphate isomerase.	2	0	1	1	1	1	1	1
EC:1.13.11.9	2,5-dihydroxypyridine 5,6-dioxygenase.	1	0	0	0	0	0	0	0
EC:1.14.13.1	Salicylate 1-monooxygenase.	1	0	0	0	0	0	0	0
EC:1.8.5.2	Thiosulfate dehydrogenase (quinone).	1	0	0	0	0	0	0	0
EC:2.6.1.16	Glutamine--fructose-6-phosphate transaminase (isomerizing).	1	1	0	0	0	0	0	0
EC:2.7.1.17	Xylulokinase.	1	2	0	0	0	0	0	0
EC:2.7.8.20	Phosphatidylglycerol--membrane-oligosaccharide glycerophosphotransferase.	1	0	0	0	0	0	0	0
EC:3.2.1.20	Alpha-glucosidase.	1	0	0	0	0	0	0	0
EC:3.5.1.106	N-formylmaleamate deformylase.	1	0	0	0	0	0	0	0
EC:3.5.1.81	N-acyl-D-amino-acid deacylase.	1	1	0	0	0	0	0	0
EC:3.5.2.2	Dihydropyrimidinase.	1	0	0	0	0	0	0	0
EC:3.5.2.5	Allantoinase.	1	1	0	0	0	0	0	0
EC:3.6.1.57	UDP-2,4-diacetamido-2,4,6-trideoxy-beta-L-altropyranose hydrolase.	1	1	0	0	0	0	0	0
EC:3.6.3.25	Sulfate-transporting ATPase.	1	1	0	0	0	0	0	0
EC:4.1.1.2	Oxalate decarboxylase.	1	0	0	0	0	0	0	0
EC:4.1.2.52	4-hydroxy-2-oxoheptanedioate aldolase.	1	0	0	0	0	0	0	0
EC:4.1.3.34	Citryl-CoA lyase.	1	0	0	0	0	0	0	0
EC:4.1.99.14	Spore photoproduct lyase.	1	1	0	0	0	0	0	0
EC:5.1.3.3	Aldose 1-epimerase.	1	0	0	0	0	0	0	0
EC:5.1.3.8	N-acylglucosamine 2-epimerase.	1	0	0	0	0	0	0	0
EC:5.2.1.1	Maleate isomerase.	1	0	0	0	0	0	0	0
EC:5.3.1.5	Xylose isomerase.	1	0	0	0	0	0	0	0
EC:6.5.1.1	DNA ligase (ATP).	1	0	0	0	0	0	0	0
EC:1.2.4.1	Pyruvate dehydrogenase (acetyl-transferring).	0	6	4	4	4	4	4	4
EC:2.3.1.9	Acetyl-CoA C-acetyltransferase.	0	6	4	4	2	2	1	2
EC:6.2.1.3	Long-chain-fatty-acid--CoA ligase.	0	6	4	5	3	4	5	3
EC:1.13.12.16	Nitronate monooxygenase.	0	4	2	2	2	2	2	2
EC:3.2.-	Hydrolases. Glycosylases.	0	4	3	3	3	3	3	3
EC:4.2.1.17	Enoyl-CoA hydratase.	0	4	1	2	2	2	1	2
EC:1.1.1.14	L-iditol 2-dehydrogenase.	0	3	0	0	0	0	0	0
EC:1.2.99.2	Carbon-monoxide dehydrogenase (acceptor).	0	3	0	0	0	0	0	0
EC:3.1.6.1	Arylsulfatase.	0	3	0	0	0	0	0	0
EC:3.6.3.17	Monosaccharide-transporting ATPase.	0	3	2	2	2	2	2	2
EC:3.6.4.-	Hydrolases. Acting on acid anhydrides. Acting on ATP; involved in cellular and subcellular movement.	0	3	2	2	2	2	2	2
EC:1.2.1.8	Betaine-aldehyde dehydrogenase.	0	2	0	0	0	0	0	0
EC:1.3.99.-	Oxidoreductases. Acting on the CH-CH group of donors. With other acceptors.	0	2	0	0	0	0	0	0
EC:2.4.1.-	Transferases. Glycosyltransferases. Hexosyltransferases.	0	2	1	1	1	1	1	1
EC:2.7.1.4	Fructokinase.	0	2	0	0	1	1	1	1
EC:2.8.1.-	Transferases. Transferring sulfur-containing groups. Sulfurtransferases.	0	2	1	1	1	1	1	1
EC:3.5.1.18	Succinyl-diaminopimelate desuccinylase.	0	2	1	1	0	0	0	0
EC:1.-	Oxidoreductases.	0	1	0	0	0	0	0	0
EC:1.14.99.44	Diapolycopene oxygenase.	0	1	0	0	0	0	0	0
EC:1.2.1.39	Phenylacetaldehyde dehydrogenase.	0	1	0	0	0	0	0	0
EC:1.3.99.26	All-trans-zeta-carotene desaturase.	0	1	0	0	0	0	0	0
EC:1.3.99.28	Phytoene desaturase (neurosporene-forming).	0	1	0	0	0	0	0	0
EC:1.3.99.29	Phytoene desaturase (zeta-carotene-forming).	0	1	0	0	0	0	0	0
EC:1.3.99.31	Phytoene desaturase (lycopene-forming).	0	1	0	0	0	0	0	0
EC:1.3.99.32	Glutaryl-CoA dehydrogenase (acceptor).	0	1	0	0	0	0	0	0
EC:1.5.3.-	Oxidoreductases. Acting on the CH-NH group of donors. With oxygen as acceptor.	0	1	0	0	0	0	0	0
EC:2.5.1.26	Alkylglycerone-phosphate synthase.	0	1	0	0	0	0	0	0
EC:2.6.1.19	4-aminobutyrate--2-oxoglutarate transaminase.	0	1	0	0	0	0	0	0
EC:2.6.1.22	(S)-3-amino-2-methylpropionate transaminase.	0	1	0	0	0	0	0	0
EC:2.7.1.16	Ribulokinase.	0	1	0	0	0	0	0	0
EC:2.7.1.5	Rhamnulokinase.	0	1	0	0	0	0	0	0
EC:3.1.12.1	5' to 3' exodeoxyribonuclease (nucleoside 3'-phosphate-forming).	0	1	0	0	0	0	0	0
EC:3.1.3.18	Phosphoglycolate phosphatase.	0	1	0	0	0	0	0	0
EC:3.4.13.22	D-Ala-D-Ala dipeptidase.	0	1	0	0	0	0	0	0
EC:3.5.1.46	6-aminohexanoate-oligomer exohydrolase.	0	1	0	0	0	0	0	0
EC:4.1.2.17	L-fuculose-phosphate aldolase.	0	1	0	0	0	0	0	0
EC:4.1.3.17	4-hydroxy-4-methyl-2-oxoglutarate aldolase.	0	1	0	0	0	0	0	0
EC:4.2.1.83	4-oxalmesaconate hydratase.	0	1	0	0	0	0	0	0
EC:5.1.3.29	L-fucose mutarotase.	0	1	0	0	0	0	0	0
EC:5.1.3.30	D-psicose 3-epimerase.	0	1	0	0	0	0	0	0
EC:5.1.3.31	D-tagatose 3-epimerase.	0	1	0	0	0	0	0	0
EC:5.3.1.25	L-fucose isomerase.	0	1	0	0	0	0	0	0
EC:6.3.4.6	Urea carboxylase.	0	1	0	0	0	0	0	0
